1                   **Cellular plasticity balances the metabolic and proliferation dynamics**  
2                                           **of a regenerating liver**

3           Ullas V. Chembazhi<sup>1\*</sup>, Sushant Bangru<sup>1,2\*</sup>, Mikel Hernaez<sup>3,4</sup>, and Aunash Kalsotra<sup>1,2,3§</sup>

4           <sup>1</sup>Department of Biochemistry, <sup>2</sup>Cancer Center@Illinois, and <sup>3</sup>Carl R. Woese Institute for  
5           Genomic Biology, University of Illinois, Urbana-Champaign, IL, United States. <sup>4</sup>Center for  
6           Applied Medical Research (CIMA), University of Navarra, Pamplona, Navarra, Spain.

7           \*Equal contribution

8           §To whom correspondence should be addressed. E-mail: [kalsotra@illinois.edu](mailto:kalsotra@illinois.edu)

9           Phone: 1-217-300-7654

10          Fax: 1-713-798-5838.

11          **Running title:** Single-cell analysis of liver regeneration

12          **Keywords:** Liver regeneration, single cell RNA sequencing, developmental reprogramming,  
13          hepatocellular plasticity, Regulons and gene regulatory networks, cell state transitions, cell-cell  
14          communication

15 **ABSTRACT**

16           The adult liver has exceptional ability to regenerate, but how it sustains normal metabolic  
17 activities during regeneration remains unclear. Here, we use partial hepatectomy (PHx) in  
18 tandem with single-cell transcriptomics to track cellular transitions and heterogeneities of  
19 ~22,000 liver cells through the initiation, progression, and termination phases of mouse liver  
20 regeneration. Our results reveal that following PHx, a subset of hepatocytes transiently  
21 reactivates an early-postnatal-like gene expression program to proliferate, while a distinct  
22 population of metabolically hyperactive cells appears to compensate for any temporary deficits  
23 in liver function. Importantly, through combined analysis of gene regulatory networks and cell-  
24 cell interaction maps, we find that regenerating hepatocytes redeploy key developmental gene  
25 regulons, which are guided by extensive ligand–receptor mediated signaling events between  
26 hepatocytes and non-parenchymal cells. Altogether, our study offers a detailed blueprint of the  
27 intercellular crosstalk and cellular reprogramming that balances the metabolic and proliferation  
28 requirements of a regenerating liver.

## 29 INTRODUCTION

30 The liver is a multi-functional organ critical for carrying out numerous metabolic,  
31 biosynthetic, and detoxification functions. Owing to its detoxification roles, the liver is frequently  
32 exposed to many hepatotoxins resulting in tissue damage and cell death. Accordingly, it has  
33 evolved a unique ability to regenerate in response to a wide range of physical and toxic injuries  
34 (Diehl and Chute, 2013; Taub, 2004), and remarkably, mammalian livers can replenish up to  
35 70% of the lost tissue mass and functionality within weeks of surgical resection (Bangru and  
36 Kalsotra, 2020; Michalopoulos and DeFrances, 1997; Michalopoulos, 2007; 2017). However,  
37 hepatic regeneration in humans is compromised after certain xenobiotic injuries, viral infections,  
38 chronic inflammation, or excessive alcohol consumption, which can lead to fibrosis and fulminant  
39 liver failure (Cordero-Espinoza and Huch, 2018; Forbes and Newsome, 2016; Louvet and  
40 Mathurin, 2015; Richardson et al., 2007; Seitz et al., 2018). It is estimated that nearly two million  
41 people die from liver disease every year, making it a prominent cause of global morbidity and  
42 mortality (Asrani et al., 2019; Marcellin and Kutala, 2018).

43 As most liver injuries trigger hepatocyte death, the regenerative course is primarily  
44 devoted to replenishing the lost hepatocyte population. Several cell-fate and lineage-tracing  
45 studies have determined that—under normal circumstances—the majority of new hepatocytes  
46 are derived from pre-existing hepatocytes instead of hepatic stem cells (Font-Burgada et al.,  
47 2015; Schaub et al., 2014; Yanger et al., 2014). Intriguingly, depending on the extent of the  
48 injury, surviving hepatocytes rely on hypertrophic growth, cellular proliferation, or both to restore  
49 normal liver function (Bangru and Kalsotra, 2020; Miyaoka et al., 2012). Consequently, in order  
50 to stimulate cell division and growth, the regenerating hepatocytes undergo global alterations in  
51 gene expression, which are achieved by dynamic changes in mRNA abundance, splicing and  
52 translation (Aloia et al., 2019; Bangru et al., 2018; Hyun et al., 2020; Rychtrmoc et al., 2012;  
53 Sato et al., 2017; Wang et al., 2020; 2019; Zahm et al., 2020). Although many previous studies

54 have focused on the proliferative capacity of hepatocytes, the exact mechanics of regeneration  
55 such as how quiescent hepatocytes transition into a proliferative state, how regenerating livers  
56 sustain normal metabolic activities as the tissue recovers from injury, or what cell-cell  
57 interactions initiate and terminate the regenerative response is unknown.

58 Here, we leveraged a single-cell RNA sequencing (scRNA-seq) strategy to capture all  
59 resident cell types from mouse livers and dissected their cellular heterogeneities and responses  
60 to 70% partial hepatectomy (PHx) during the initiation, progression, and termination phases of  
61 regeneration (Mitchell and Willenbring, 2008; Zheng et al., 2017). Our analyses revealed that  
62 following PHx, the transcriptomes of regenerating hepatocytes are extensively reprogrammed  
63 as they bifurcate into “metabolically hyperactive” or “proliferating” states. Using in-depth  
64 trajectory inferences, we found that after PHx, a subset of residual hepatocytes reversibly  
65 activate an early-postnatal-like gene program to support cell division and growth while a distinct  
66 population of hepatocytes upregulates their adult metabolic gene program to offset regeneration-  
67 induced deficits in liver function. Our combined analysis of gene regulatory networks and cell-  
68 cell interactions uncovered that dynamic changes in the activity of key regulons within  
69 hepatocytes—orchestrated by the activation of specific non-parenchymal cells—balance the  
70 metabolic and proliferation needs of a regenerating liver. These findings support a division of  
71 labor model wherein hepatocytes acquire alternate states to enable normal metabolic activities  
72 as the liver restores its lost tissue mass. We also identify a vast array of ligand-receptor  
73 interactions among hepatocytes, endothelial, Kupffer, stellate, and T cells that coordinate the  
74 overall time course of liver regeneration. Thus, our study offers a high-resolution view of the  
75 cellular and molecular basis of liver regeneration while providing a rich resource for the  
76 identification of genes and signaling pathways that facilitate hepatic repair in response to injury.



## 77 RESULTS

### 78 Cell type composition, heterogeneity and metabolic dynamics of a regenerating liver

79 Surgical resection of the adult mouse liver by 2/3<sup>rd</sup> PHx induces rapid hyperplasia and  
80 hypertrophy in the remnant tissue, such that the liver recovers its original mass and function  
81 within seven days (Boyce and Harrison, 2008; Mitchell and Willenbring, 2008) (**Figure 1A,**  
82 **Figure 1—figure supplement 1A**). Hepatocytes, which constitute the bulk of liver parenchyma  
83 are among the first cells to enter cell cycle after PHx, followed by the proliferation of other stromal  
84 cells (Fausto et al., 2006; Su et al., 2002). By labeling new DNA synthesis with 5-ethynyl-2'-  
85 deoxyuridine (EdU) and combining it with hepatocyte nuclear factor 4-alpha (*Hnf4a*)  
86 immunostaining (Bangru et al., 2018), we detected maximal hepatocyte proliferation activity  
87 between 24 and 72 hours (h) after PHx, which peaked around 36-48h (**Figure 1B, Figure 1—**  
88 **figure supplement 1B**). Therefore, to sample the cellular composition and diversity as well as  
89 profile their regenerative response at a single-cell resolution, we utilized 10x genomics-based  
90 scRNA-seq platform and studied the transcriptomes of all resident cell types isolated from mouse  
91 livers at 24, 48, and 96h after PHx or sham surgery (**Figure 1C, Figure 1—figure supplement**  
92 **1C**). In parallel, we also collected cells from postnatal day 14 (P14) livers—a midpoint between  
93 the neonatal period and weaning—and performed scRNA-seq to analyze the cellular transitions  
94 and gene programs associated with normal maturation of the liver. Single cells were isolated by  
95 two-step collagenase perfusion (Bhate et al., 2015; Li et al., 2010), followed by magnetic-  
96 activated cell sorting that allows rapid and easy removal of dead cells.

97 After stringent quality control and normalization (**Figure 1—figure supplement 2A-C**),  
98 we captured a total of 22,068 cells that were evenly distributed among the five time points and  
99 had a mean UMIs of 2148 and a median of 1097 genes per cell (**Figure 1D—figure supplement**  
100 **2B**). A higher fraction of reads from the mitochondrial genome is often associated with low quality  
101 or dying cells (Ilicic et al., 2016). Because hepatocytes possess a very high mitochondrial content

102 (MacParland et al., 2018; Weibel et al., 1969), we used a relatively higher percentage of  
103 mitochondrial-read threshold (30%) in our analysis. To allow cross-sample comparisons, we  
104 integrated datasets from all samples and corrected their batch effects using the BEER algorithm  
105 (Zhang et al., 2019). Cell-type identity was assigned based on the top differentially expressed  
106 genes and from the previously identified lists of canonical cell-type-specific markers  
107 (MacParland et al., 2018; Xiong et al., 2019). Next, a graph-based clustering was performed to  
108 group cells according to their gene expression profiles. Visualization of the integrated dataset  
109 using Uniform Manifold Approximation and Projection (UMAP) classified 18,272 hepatocytes  
110 and 3,796 non-parenchymal cells (NPCs) based on their relative expression of *Hnf4a*, and the  
111 mesenchyme-derived cell marker Vimentin (*Vim*), respectively (**Figure 1D, E**). The NPC  
112 population was further resolved into eight distinct clusters that represented liver sinusoidal  
113 endothelial cells (LSECs), stellate cells, Kupffer cells, dendritic cells, T-cells,  $\gamma$ - $\delta$  T-cells, Plasma  
114 B cells and NK cells (**Figure 1F, G**) and (**Figure 1—figure supplements 3A, B, and 4**). We  
115 could not identify any cholangiocytes, and we attribute this absence to their relatively low  
116 numbers in quiescent and PHx-induced regenerating livers. Of note, previous single-cell studies  
117 that analyzed NPCs also failed to capture cholangiocytes after random sampling and had to  
118 apply additional sorting strategies to enrich for these small biliary epithelial cell (BEC)  
119 populations (Aizarani et al., 2019; Pepe-Mooney et al., 2019; Xiong et al., 2019).

120 Metabolic adaptation due to hepatic insufficiency is a hallmark of liver tissue renewal and  
121 regeneration (Caldez et al., 2018; Huang and Rudnick, 2014; Locasale and Cantley, 2011).  
122 Accordingly, we assessed changes in the strength of metabolic pathways among hepatocytes  
123 isolated from naïve and regenerating (PHx) livers. Several pathways were coordinately  
124 downregulated at 24 and 48h after PHx, evident from a global shift in their pathway score  
125 distribution (**Figure 2A, B**). Whereas the gene sets belonging to fatty acid, lipid, and amino acid  
126 metabolism showed the most drastic decrease through the initiation (24h after PHx) and

127 progression (48h after PHx) phases of regeneration, other pathways such as glycolysis,  
128 gluconeogenesis, and pentose monophosphate shunt were only subtly muted (**Figure 2A**).  
129 Notably, the dampening of liver metabolism was transient and largely reversed in the termination  
130 phase (96h after PHx), revealing the dynamic nature of such changes evoked during  
131 regeneration. Moreover, while assessing the strength of different pathways/gene sets, we found  
132 striking trends wherein at times when biosynthesis, detoxification, complement/coagulation and  
133 other secretory functions associated with mature hepatocytes were downregulated, the  
134 pathways related to cell cycle, proliferation, and growth such as ribosome biogenesis as well as  
135 RNA processing, splicing, and translation were upregulated (**Figure 2B**). Interestingly, although  
136 the cell cycle and growth-related pathways had predominantly switched off at 96h after PHx,  
137 some of the adult hepatocyte functions were not yet fully restored by this time. These results are  
138 in line with those of recent reports that explored how cell division and energy metabolism  
139 intersect in support of liver regeneration (Bangru et al., 2018; Caldez et al., 2018; Wang et al.,  
140 2018; 2019); and they highlight the metabolic flexibility of regenerating hepatocytes as they  
141 repopulate the liver to restore its lost mass and function.

## 142 **Pseudo-temporal arrangement of hepatocytes unveils cellular transitions in regeneration** 143 **and reprogramming to a postnatal-like state**

144 To map the cellular transitions as hepatocytes move from a quiescent to proliferative state  
145 and back, we performed pseudotime ordering of hepatocytes and built their individual  
146 trajectories. We used DDRTree implementation in Monocle 2, wherein top differentially  
147 expressed genes among hepatocytes collected from different time points were used for ordering  
148 cells (Qiu et al., 2017b). We constructed discrete cell-state trajectories for **1**) the normal postnatal  
149 maturation (P14→Adult), **2**) the initiation–progression phase of regeneration  
150 (Adult→PHx24→PHx48), and **3**) the termination–rematuration phase of regeneration

151 (PHx48→PHx96) (**Figure 2C**). For both postnatal maturation and termination–rematuration  
152 trajectories, the cells from respective time points yielded distinct branches with a few  
153 transitioning cells (**Figure 2C, top & bottom panels**). Conversely, for the initiation–progression  
154 phase trajectory, whereas a large number of regenerating hepatocytes diverged away from the  
155 adult state, a significant portion retained their mature identity, revealing a distributive model of  
156 regeneration (**Figure 2C, middle panel**).

157       Next, to identify the functional pathways changing within individual trajectories, we  
158 determined the expression dynamics of top 2000 genes that vary as a function of progress  
159 through the pseudotime. Along the postnatal maturation trajectory, the expression of genes  
160 encoding RNA processing, ribosome assembly and translational regulation factors declined first,  
161 followed by simultaneous increase in the expression of genes associated with various adult  
162 hepatocyte functions (**Figure 2D, left panel**). Recently, bulk transcriptome analyses revealed  
163 that in response to toxin-mediated injury, regenerating hepatocytes reprogram to an early  
164 postnatal-like state (Bangru et al., 2018). But, it is unclear whether regeneration after PHx  
165 involves a similar reprogramming event. We observed that along the initiation–progression  
166 trajectory of regeneration—opposite to postnatal maturation—many metabolic genes in  
167 hepatocytes were downregulated prior to the upregulation of genes encoding cell cycle, RNA  
168 processing, and translation regulation factors. Particularly, the genes involved in ribosome  
169 biogenesis and assembly were activated only briefly along the pseudotime, underscoring that a  
170 temporary boost in protein synthesis is needed to prime hepatocytes for cell cycle re-entry  
171 (**Figure 2D, middle panel**). Meanwhile, along the termination–rematuration trajectory—similar  
172 to postnatal maturation—downregulation of cell cycle, RNA processing, and translation related  
173 genes preceded a synchronous increase in the expression of various metabolic and biosynthetic  
174 genes (**Figure 2D, right panel**).

175 It has been postulated that most hepatocytes can re-enter the cell cycle and proliferate  
176 after 2/3<sup>rd</sup> PHx (Michalopoulos, 2007). To determine if all hepatocytes after PHx reprogram to a  
177 postnatal-like state and proceed simultaneously towards the proliferative trajectory, we  
178 performed pseudotime ordering of cells from all time points (i.e., P14, Adult (sham), PHx24,  
179 PHx48 & PHx96) (**Figure 2E**). We found that while the P14 and adult hepatocytes resided on  
180 separate arms of the trajectory, regenerating hepatocytes were distributed among all three arms  
181 (**Figure 2F**). Interestingly, the majority of hepatocytes at 24h after PHx migrated away from their  
182 adult position at the beginning of pseudotime and occupied a position around the branch point  
183 (**Figure 2F**). At 48h after PHx, a large number of hepatocytes inhabited the far right arm of the  
184 trajectory overlapping with the position of P14 hepatocytes. However, at 96h after PHx, most  
185 hepatocytes had left the P14 state returning back to their initial adult state (**Figure 2F**). Thus,  
186 our pseudotime analysis captured the remarkable cellular plasticity exhibited by hepatocytes as  
187 they progress through different stages of regeneration. Intriguingly, at all times, a considerable  
188 population of cells remained adult-like and occupied their original position on the pseudotime  
189 axis, indicating that not all hepatocytes are reprogrammed after PHx (**Figure 2F**). Together,  
190 these findings illustrate that reversible postnatal-like reprogramming facilitates hepatocytes in  
191 transitioning from a quiescent to proliferative state and back. The dampening of mature  
192 hepatocyte characteristics followed by a transient increase in global protein synthesis is likely a  
193 pre-requisite for cell cycle re-entry and to jump-start the regenerative process.

#### 194 **Division of labor balances the metabolic and proliferation activities of regenerating** 195 **hepatocytes**

196 The DDRTree algorithm resolved our pseudotime trajectory into nine distinct hepatocyte  
197 populations (HEP1–HEP9) (**Figure 3—figure supplement 1A**). Consequently, to gain a deeper  
198 insight into the HEP1–HEP9 populations, we determined their gene expression profiles along

199 the pseudo-temporal trajectory. We found that HEP1 and HEP2 populations were enriched for  
200 genes expressed in immature hepatocytes and de-enriched for genes expressed in mature  
201 hepatocytes (**Figure 3—figure supplement 1B**). Contrary to HEP1 and HEP2, the HEP4 and  
202 HEP7 populations were enriched for genes expressed in mature and de-enriched for genes  
203 expressed in immature hepatocytes. HEP3, HEP5–6, and HEP8–9 populations showed  
204 intermediate enrichment for immature and de-enrichment for mature gene expression (**Figure**  
205 **3—figure supplement 1B**). Based on these transcriptome signatures, we categorized HEP1–  
206 HEP9 populations into four broader clusters. The sham adult HEP4 cluster was designated as  
207 the “quiescent state”. The cluster near the branch point emerging after PHx and comprising  
208 HEP3, HEP5–6, and HEP8–9 populations was termed as the “transition state”. Further, the  
209 cluster formed by HEP1 and HEP2 populations was marked as the “proliferative state”, whereas  
210 the cluster formed by the HEP7 population was designated as the “metabolically hyperactive  
211 state” (**Figure 3A, B**).

212 The quick emergence of the transition state following PHx suggested that it is derived  
213 from the quiescent state, after which it bifurcates towards the proliferative or metabolically  
214 hyperactive states. To further study how gene expression diverges after PHx and generates  
215 discrete clusters of proliferative and metabolically active hepatocytes, we used BEAM module  
216 analysis within the Monocle 2 pipeline. We identified genes changing along different arms of the  
217 DDRTree, and these were grouped into three main classes (**Figure 3A**). The class I contained  
218 genes that were highly expressed in the quiescent state, downregulated as the bifurcation point  
219 was approached, and upregulated again in the metabolically hyperactive state. In contrast,  
220 classes II and III contained genes that were poorly expressed in the quiescent state, upregulated  
221 as cells progressed through the transition point, but were then reciprocally up or downregulated  
222 in the proliferative and metabolically hyperactive states, respectively. Upon further gene set  
223 enrichment analysis, we confirmed that the metabolically hyperactive hepatocytes showed

224 overrepresentation of functional categories related to biosynthesis and metabolism (**Figure 3A,**  
225 **D**). Conversely, hepatocytes associated with the proliferative state showed an  
226 overrepresentation of cell cycle and growth related functional categories, including DNA  
227 replication, and mitosis (**Figure 3A, C, D**). Consistent with these results, recent histological  
228 analysis of regenerating mice livers after PHx detected intertwined sets of hepatocytes that  
229 clearly segregate according to elevated glycogen content with low mitotic activity or reduced  
230 glycogen content with high mitotic activity (Minocha et al., 2017).

231 Having demarcated the four cellular states along the trajectory, we reasoned that if  
232 metabolically hyperactive hepatocytes do actually compensate for any temporary deficits in liver  
233 function while other hepatocytes proliferate, they should exhibit a surge in the expression of  
234 metabolic genes after PHx. To test for this possibility, we analyzed the cells of metabolically  
235 hyperactive state in relation to their time point of origin. Interestingly, relative to sham adults,  
236 metabolically active hepatocytes at 24h after PHx showed significantly higher expression of  
237 biosynthetic, metabolic, detoxification, and transport related genes, which started to decline at  
238 48h and were essentially reversed by 96h after PHx (**Figure 3E**). Collectively, these data support  
239 a division of labor model—wherein after PHx—a subset of residual hepatocytes acquire the  
240 metabolically hyperactive state that upregulates its adult gene program to counteract  
241 regeneration-associated deficits in liver function.

## 242 **Rewiring of gene regulatory networks activates cell state transitions during regeneration**

243 To delineate the gene regulatory networks (GRNs) that might stimulate various cell state  
244 transitions in regeneration, we used single-cell regulatory network inference and clustering  
245 (SCENIC) pipeline (Aibar et al., 2017) on our scRNA-seq data (see methods). SCENIC  
246 computes the activity of transcription factors from individual cells by integrating co-expression  
247 data with transcription factor motif enrichment analysis, generating a “regulon”, which refers to



248 an expressed transcription factor and all of its co-expressed target genes. We obtained the  
249 regulon activities using AUCell, which ranks targets of each regulon among the expressed genes  
250 in each cell, yielding a regulon-by-cell activity matrix. The overarching function of SCENIC is to  
251 create regulon-driven clusters that are generated from the regulon-activity matrix through  
252 binarizing (by thresholding) the original AUCell score. We, however, discerned that instead of  
253 binarizing, maintaining the full AUCell score improves the inferences performed on the data.

254 We hypothesized that the reimplementation of certain developmental GRNs might drive  
255 cellular transitions during regeneration. To test this hypothesis, we analyzed the AUCell score  
256 activity matrix of individual hepatocytes acquired from all time points (i.e., P14, Adult, PHx24,  
257 PHx48 & PHx96). Upon visualization of cell clustering from UMAP—built from the AUCell  
258 scores—we noted that hepatocytes from specific time points grouped together, underscoring a  
259 high degree of similarity in their regulon activity (**Figure 4A, B**). Importantly, the P14 and adult  
260 stage hepatocytes formed distinct non-overlapping clusters at far ends of the UMAP plot,  
261 representing clear differences in their GRNs. The hepatocytes from 24h and 48h after PHx,  
262 however, clustered adjacent to P14 and away from the adult stage, demonstrating that similar  
263 regulons are active during postnatal development and initiation–progression phases of  
264 regeneration. Interestingly, very few PHx96 hepatocytes overlapped with P14, PHx24, or PHx48  
265 time points (**Figure 4A, B**). Instead, they were clustered around adult cells, which indicates that  
266 in the termination phase, hepatocytes restore their mature adult-like regulon activity. Based on  
267 these findings, we conclude that in order to reprogram gene expression after PHx, the liver cells,  
268 in part, redeploy the same GRNs that are utilized for physiologic growth during the postnatal  
269 period of liver development.

270 Next, we explored regulon activities distinguishing the cellular features of normal and  
271 regenerating hepatocytes. Our goal was to identify GRNs that are selectively activated during  
272 the initiation–progression and the termination–rematuration stages of regeneration. We



273 reasoned that regulon activities of the initiation–progression GRNs would typically be low in adult  
274 hepatocytes, stimulated at PHx24 and PHx48, and muted again at PHx96. Correspondingly,  
275 regulon activities of the termination–rematuration GRNs would normally be high in adult  
276 hepatocytes, muted at PHx24 and PHx48, and stimulated again at PHx96. Indeed, within the 56  
277 differentially active regulons, we detected many that fit these criteria (**Figure 4C, Figure 4—**  
278 **figure supplement 1A-D**). For instance, RELA, E2F1, GABPB1, ETS2 regulons were active in  
279 hepatocytes from P14 and the initiation–progression stage of regeneration, but were turned off  
280 in adult hepatocytes and at the termination–rematuration stages (**Figure 4C cluster I, 4D**). This  
281 indicates that these regulons likely play dual roles in regulating the hepatocyte hyperplastic  
282 response — i.e., in normal liver development and following an injury in adult animals. In line with  
283 our results, previous studies have found that a rapid increase in the expression and/or DNA  
284 binding activity of NF- $\kappa$ B (RELA and RELB), E2Fs (E2F1, 3, 4, 6 and 8), AP-1 (JUN and FOS),  
285 POLE4, TRP53, MYC, CREM, and ETS (ETS2, GABPB1) family of transcription factors is  
286 involved in the initiation of stress signaling, oxidative stress, DNA replication/repair, and cell-  
287 cycle entry at the early stages of liver regeneration (Baena et al., 2005; Beyer et al., 2008; Bhat  
288 et al., 1987; Chaisson et al., 2002; Colak et al., 2020; Jimuro et al., 1998; Inoue et al., 2002a;  
289 Kelley-Loughnane et al., 2002; Kurinna et al., 2013; Servillo et al., 1998; Sladky et al., 2020;  
290 Stepniak et al., 2006; Su et al., 2002; Westwick et al., 1995; Wu et al., 2013; Yang et al., 1991;  
291 Zellmer et al., 2010).

292 In contrast, HNF4A, DBP, CEBPA, and HES6 regulons were highly active in adult  
293 hepatocytes, muted at P14 and the initiation–progression stages, but then reactivated at the  
294 termination–rematuration stage (**Figure 4C cluster II, 4E**), pointing towards their role in the  
295 termination of liver regeneration. The function of hepatocyte nuclear factor 4A (HNF4A), a  
296 nuclear receptor, in hepatocyte differentiation is well established (Kyrmizi et al., 2006; Parviz et  
297 al., 2003) — as it directs the expression of gene programs involved in xenobiotic, carbohydrate,

298 and fatty acid metabolism as well as in bile acid synthesis, blood coagulation, and ureagenesis  
299 (Hayhurst et al., 2001; Inoue et al., 2002b; 2006a; 2004; 2006b; Nishikawa et al., 2015; Schrem  
300 et al., 2002). Previous studies have described HNF4A's anti-proliferative effects in hepatocytes  
301 (Bonzo et al., 2012; Hatzia Apostolou et al., 2011; Walesky et al., 2013), and more recently, it was  
302 found that HNF4A is indispensable for terminating regeneration after PHx (Huck et al., 2019).  
303 Consistent with our regulon activity scores, HNF4A protein levels diminish rapidly after PHx, and  
304 this initial decrease followed by re-expression is needed for hepatocytes to timely enter and exit  
305 the cell cycle and to re-establish mature liver functions once regeneration is complete (Huck et  
306 al., 2019).

307 Like HNF4A, dynamic and temporally regulated activities of the CAAT/Enhancer-Binding  
308 Proteins (CEBPs) are critically important for coordinating gene expression changes through the  
309 shifting phases of regeneration (Greenbaum et al., 1995; 1998; Jin et al., 2015). CEBPA and  
310 CEBPB are basic region leucine zipper containing transcription factors that act as homo or  
311 heterodimers and bind similar DNA sequences (Osada et al., 1996). Interestingly, we found that  
312 CEBPA and CEBPB regulon activities exhibit an opposing pattern through the initiation–  
313 progression and termination–rematuration stages of regeneration (**Figure 4C, E, Figure 4—**  
314 **figure supplement 1B**). CEBPA regulon activity—comprising metabolic and liver homeostatic  
315 genes—is high in pre-PHx adult hepatocytes, suppressed at PHx24 and PHx48, then enhanced  
316 in PHx96 hepatocytes. Conversely, CEBPB regulon activity—comprising many acute phase and  
317 cell cycle related genes—is low in pre-PHx adult hepatocytes, but rapidly up-regulated after PHx.  
318 Of note, CEBPA and CEBPB usually bind the same genomic locations in hepatocytes (Jakobsen  
319 et al., 2013), except with divergent temporal patterns during regeneration (Kuttippurathu et al.,  
320 2017). These dynamic shifts in genomic occupancies are tightly linked to the changes in the  
321 relative ratio of CEBP proteins such that a high CEBPA:CEBPB ratio promotes binding to *cis*-  
322 regulatory sequences boosting metabolic and suppressing acute phase response genes,

323 whereas a low ratio directs binding to sequences that repress metabolic and activate cell cycle  
324 and acute phase related genes (Jakobsen et al., 2013). Although direct roles of D-box binding  
325 protein (DBP, a circadian PAR bZIP transcription factor) or HES family of basic helix-loop-helix  
326 transcription factor 6 (HES6) in liver regeneration are not yet explored, their regulon activity  
327 patterns (**Figure 4E**) hint both as likely termination factors.

328 We also recognized several regeneration-specific regulons that became activated after  
329 PHx but were otherwise inactive in postnatal development (**Figure 4C cluster III, Figure 4—  
330 figure supplement 1A**). Intriguingly, some developmental regulons that were redeployed  
331 following PHx maintained their activated/deactivated patterns up to 96h, indicative of their  
332 extended role in regeneration (**Figure 4C cluster IV, Figure 4—figure supplement 1B**). Finally,  
333 we also detected some development-specific regulons that were not redeployed either in the  
334 initiation–progression or in the termination–rematuration stages of regeneration (**Figure 4C  
335 cluster V, Figure 4—figure supplement 1C**), suggesting that a portion of the genetic  
336 machinery critical for physiological liver growth and development is dispensable for regeneration.  
337 Hence, a variety of GRNs positively and negatively impact hepatocyte proliferation, and dynamic  
338 utilization of transcription factors instructs these regulons to synchronize the timely initiation,  
339 progression, and termination of liver regeneration.

340 We next studied the correlation of regulon activities with the pseudo-temporal transition  
341 of hepatocytes, and the four cellular states described earlier (**Figure 4F-I, Figure 4—figure  
342 supplement 2**). By overlaying AUCell scores along the pseudotime trajectory, we noticed that  
343 RELA, E2F1, GABPB1, and ETS2 regulons—which were active in hepatocytes from P14 and  
344 initiation–progression stages of regeneration—displayed significantly higher activity in the  
345 proliferative state relative to quiescent, transition, or metabolically hyperactive states (**Figure  
346 4F, H**). In contrast, HNF4A, DBP, CEBPA, and HES6 regulons—all of which promote mature  
347 functions—were much more active in quiescent and metabolically hyperactive states relative to

348 transition or proliferative states (**Figure 4G, I**). Collectively, these data indicate that underlying  
349 changes in regulon activities are critical for determining hepatocyte identities and cell state  
350 transitions, which help preserve the highly specialized liver functions while the regenerating  
351 tissue balances its metabolic and proliferation needs.

### 352 **Transitions in hepatocyte states dictate the dynamics of intercellular signaling during** 353 **regeneration**

354 Next, we explored the dynamics of potential cell-cell communication networks at different  
355 stages of regeneration. We first inspected the cell type-specific RNA expression of various  
356 ligands in the liver secretome and their corresponding receptors, as previously described (Xiong  
357 et al., 2019). Our analysis mapped numerous unique clusters of ligand-receptor pairs with cell-  
358 type-specific expression patterns, which highlights the distinct roles of hepatocytes and NPCs in  
359 shaping intrahepatic signaling topologies (**Figure 5A**). Among NPCs, we noticed that LSECs  
360 and stellate cells comprised the largest clusters, underscoring their predominant roles in cell  
361 signaling (**Figure 5A, left**). Significant differences in ligand-receptor expression profiles were  
362 also detected among hepatocytes belonging to different states, which indicates the remodeling  
363 of interaction landscapes with cell state transitions (**Figure 5A, right**).

364 Particularly, we noted that many signaling molecules with established roles in liver  
365 regeneration—such as cytokines, chemotactic factors, secreted matrix proteins, growth factors,  
366 adhesion molecules, and mitogens—originate from specific cell types (**Figure 5—figure**  
367 **supplement 1A-C**). Expression of *Wnt2*, for instance, was predominantly seen in LSECs  
368 (**Figure 5—figure supplement 1C**), reaffirming results from previous studies of liver  
369 regeneration following PHx and acute CCl<sub>4</sub> toxicity (Ding et al., 2010; Preziosi et al., 2018; Zhao  
370 et al., 2019). Importantly, pseudotime ordering revealed that upregulation of *Wnt2* and *Hgf*  
371 expression correlates with the transition of LSECs to an activated state (**Figure 5—figure**  
372 **supplement 2A, B and C**), and as reported earlier, associates with *VEGFR2-Id1* activity (Ding

373 et al., 2010). Furthermore, *Wnt2* was expressed at much lower levels in Kupffer cells relative to  
374 LSECs (**Figure 5—figure supplement 1C**), consistent with their minor role in Wnt- $\beta$ -catenin  
375 signaling (Preziosi et al., 2018; Russell and Monga, 2018; Yang et al., 2014).

376 To study the intracellular crosstalk among hepatic cell types and how it is modified during  
377 regeneration, we constructed cell-cell communication networks (Farbehi et al., 2019) for each  
378 time point from our dataset (**Figure 5B, Figure 5—figure supplement 3**). The edges of the  
379 network are directed from source to target cells, which express specific ligands and their  
380 corresponding receptors, respectively. The thickness of edges corresponds to weights  
381 representing fold-changes in the expression of ligands-receptor pairs (see methods). Together,  
382 this generated a weighted and directed network of potential cell-cell interactions within normal  
383 and regenerating livers. Strikingly, the cell-cell communication networks underwent significant  
384 rewiring, evoking a transient increase in overall cellular crosstalk during regeneration. We  
385 noticed a remarkable increase in interactions between hepatocytes and NPCs at PHx24 and  
386 particularly at PHx48, followed by a re-establishment of an adult-like communication network at  
387 PHx96. Hepatocytes displayed discrete profiles of interactions with other cell-types in a state-  
388 dependent manner, as expected from the differences in ligand-receptor expression observed in  
389 **Figure 5A**. Throughout regeneration, quiescent hepatocytes consistently made strong inbound  
390 and outbound connections with most other cell types, whereas transition state hepatocytes were  
391 refractory to any crosstalk. The metabolically hyperactive hepatocytes exhibited an adaptable  
392 pattern, with prominent interactions at PHx48, but minimal interactions otherwise. Interestingly,  
393 the proliferating hepatocytes presented a unique interaction landscape with strong outbound  
394 connections and few to no inbound connections. It is noteworthy that cells transitioning to the  
395 proliferating state are more amenable to regenerative cues such that continued stimulation by  
396 pro-proliferative ligands would lead to excessive/uncontrolled proliferation. We postulate that the

397 downregulation of receptors related to pro-proliferative signals might be crucial for limiting the  
398 endless proliferation of hepatocytes and facilitating their timely exit from the cell cycle.

399         Next, we studied the individual ligand-receptor interactions among various cell types. We  
400 constructed dot-plots for each time point demonstrating all ligand-receptor interactions with a  
401 minimum path weight of 1.5, for all significant cell-cell relationships ( $P_{adj} < 0.01$ )  
402 **(Supplementary data files 1-5)**. This provided comprehensive visualization of potential cellular  
403 interactions, divulging time-point specific differences in outbound and inbound signaling from/to  
404 hepatocytes. Even at PHx48, when maximal intercellular crosstalk was observed, proliferative  
405 state hepatocytes appeared to receive a distinctly low number of incoming signals **(Figure 5C,**  
406 **Supplementary data files 1-5)**, which matched with the lower inbound edges to these cells  
407 seen in **Figure 5B**. Contrary to this, we detected significant inbound signaling towards quiescent  
408 and metabolically-hyperactive state hepatocytes, which was mediated by several growth factors,  
409 interleukins, and the Wnt signaling pathway **(Figure 5C, Supplementary data files 1-5)**. For  
410 instance, consistent with earlier reports, our analysis predicted hepatocytes to receive prominent  
411 HGF/MET signaling from LSECs and stellate cells (Furge et al., 2000; LeCouter et al., 2003;  
412 Maher, 1993; Schirmacher et al., 1992). We did not capture an EGF-signaling network among  
413 different cell types, which is in agreement with low EGF expression in hepatic cells **(Figure 5—**  
414 **figure supplement 1C)** and its predominantly exogenous origin (Olsen et al., 1985; St Hilaire  
415 and Jones, 1982; St Hilaire et al., 1983). However, we detected prominent heparin binding (HB)-  
416 EGF signaling from Kupffer cells and LSECs and other NPC populations (Kiso et al., 1995;  
417 2003). Notably, although TGF- $\beta$  protein levels in hepatocytes are debatable (Bissell et al., 1995;  
418 Braun et al., 1988; Carr et al., 1989; Nakatsukasa et al., 1990), we found that *Tgfb1* RNA is  
419 abundant in regenerating hepatocytes as well as most NPCs, but without any significant  
420 autocrine TGF- $\beta$  activity within hepatocytes **(Figure 5—figure supplement 1C, Figure 5C)**. As  
421 expected, we detected many known mitogenic signals inbound to hepatocytes such as *Fgf*, *Tnf*

422 and *IL-6*, which were high between 24-48h after PHx, but had declined by PHx96  
423 **(Supplementary data files 1-5).**

424 Outbound signals from hepatocytes at PHx48 involved pathways such as *Tgfa*, *Vegfa*,  
425 collagen, complement, and chemokine signaling **(Figure 5D, Supplementary data files 1-5).**  
426 We noticed contrasting ligand-receptor nodes corresponding to outbound signals in  
427 metabolically hyperactive and proliferating cells, indicating opposing expression of ligands  
428 between these cell types. Certain ligands like *Tgfa* produced by hepatocytes seemed to target  
429 hepatocytes themselves. This observation is supported by the previously proposed autocrine  
430 mode of mitogenic TGF $\alpha$  action (Mead and Fausto, 1989; Reddy et al., 1996; Webber et al.,  
431 1993). On the other hand, *Vegfa* ligands were directed more towards LSECs and stellate cells,  
432 in line with their known roles in the activation of these cell populations (Ankoma-Sey et al., 1998;  
433 Ding et al., 2010; LeCouter et al., 2003; Liu et al., 2009); whereas complement system ligands  
434 appeared to target diverse intrahepatic cell populations (DeAngelis et al., 2012; Strey et al.,  
435 2003; Thorgersen et al., 2019). The cellular interactome analysis also predicted signaling events  
436 with uncharacterized roles in liver regeneration. For instance, *Col18a1\_Kdr/Itgb1/Itga5/Gpc1/4*,  
437 *Tgfa\_Egfr/Erbb3*, and/or *Psen1\_Notch1/2* signaling events are excellent candidates to evaluate  
438 in the context of their function in emergence/stabilization of the metabolically hyperactive state  
439 of hepatocytes. Altogether, our single-cell connectomics analysis identified a vast array of ligand-  
440 receptor interactions among hepatocytes and NPCs, provided a network-level portrait of  
441 intercellular crosstalk within normal and regenerating livers, and offered the first glimpse into  
442 how cell state transitions shape the intrahepatic signaling at different stages of liver regeneration.



## 443 **DISCUSSION**

444 Lately, single-cell transcriptomic methods are being employed to probe cellular  
445 heterogeneities of tissues and reconstruct developmental trajectories of individual organs  
446 (Haghverdi et al., 2016; Saelens et al., 2019; Schiebinger et al., 2019). In the case of the liver,  
447 this has led to the identification of previously unknown subpopulations of hepatocytes,  
448 cholangiocytes, endothelial cells, scar-associated macrophages, stellate cells, and  
449 myofibroblasts from healthy and diseased conditions (Aizarani et al., 2019; Dobie et al., 2019;  
450 Hyun et al., 2019; MacParland et al., 2018; Pepe-Mooney et al., 2019; Ramachandran et al.,  
451 2019; Xiong et al., 2019; Achanta et al., 2019; Cook et al., 2018). The studies revealed that  
452 more than 50% of hepatocyte genes follow a discrete zoned expression pattern in a liver  
453 lobule, and surprisingly, similar metabolic zonation exists for LSECs and stellate cells (Dobie et  
454 al., 2019; Halpern et al., 2018; 2017). Furthermore, the unbiased capture of different cell types  
455 from whole tissues has led to the discovery of genome-wide cell-cell communication networks  
456 (Farbehi et al., 2019; Raredon et al., 2019; Vento-Tormo et al., 2018; Xiong et al., 2019). Here,  
457 we demonstrate that scRNA-seq is also a powerful strategy to study gene expression dynamics  
458 and communication among diverse cell populations within a regenerating tissue.

459 By comparing transcriptome landscapes of distinct liver cell types through the physiologic  
460 and regenerative growth periods, we found that following PHx, residual hepatocytes reversibly  
461 activate an early-postnatal-like gene program to transition from a quiescent to proliferative state  
462 and back. Our analysis revealed that transient dampening of mature gene expression programs  
463 followed by a brief surge in ribosome biogenesis precedes cell-cycle activation and thus are  
464 likely required for injury-induced proliferation of hepatocytes. We further demonstrated that  
465 rewiring of developmental GRNs orchestrates cell-cycle entry during initiation of regeneration  
466 while facilitating re-maturation of the newly generated hepatocytes so they can resume their  
467 functions once regeneration is complete. Thus, controlled reactivation of the developmental and



468 cell cycle gene programs in adult hepatocytes could serve as a potential therapeutic approach  
469 to replenish dying hepatocytes in diseased livers.

470         Regeneration requires simultaneous proliferation and maintenance of highly specialized  
471 cellular functions, and fittingly a regenerating liver continues to perform its crucial metabolic,  
472 biosynthetic, and detoxification roles (Bangru and Kalsotra, 2020; Michalopoulos and  
473 DeFrances, 1997; Michalopoulos, 2007; 2017). But, how the regenerating tissue sustains these  
474 specialized functions when large numbers of cells are proliferating is still a mystery. Based on  
475 our findings, we propose a division of labor model—wherein after PHx—surviving hepatocytes  
476 undergo defined cellular transitions to allow normal metabolic activities as the regenerating liver  
477 restores its original mass. Four principal observations support this model. First, our trajectory  
478 analyses captured the extraordinary cellular plasticity of hepatocytes identifying four distinct  
479 subpopulations representing the quiescent, transition, proliferative, and metabolically  
480 hyperactive states. Second, we discovered that after PHx, quiescent hepatocytes promptly adopt  
481 an intermediate transition state from where they branch into either proliferative or metabolically  
482 hyperactive states. Third, we noticed visibly divergent regulon activities of proliferative and  
483 metabolically hyperactive hepatocytes. Cells transitioning into a proliferative state silenced  
484 regulons coordinating mature hepatocyte functions while activating regulons that support cell  
485 growth and proliferation. Conversely, cells transitioning into a metabolically hyperactive state  
486 activated multiple regulons involved in biosynthetic, metabolic, detoxification, and transport-  
487 related functions. Fourth, we observed that the metabolically hyperactive hepatocytes developed  
488 transient but strong inbound and outbound connections with non-parenchymal cell types,  
489 whereas proliferating hepatocytes selectively downregulated the receptors for inbound signals.  
490 Elimination of receptors for inbound pro-proliferative signals might be important for limiting the  
491 endless proliferation of hepatocytes and enabling their timely cell-cycle exit. Altogether, these  
492 observations illustrate that dynamic shifts in regulon activities and cell-cell interactions broaden

493 the hepatocellular plasticity to balance the metabolic and proliferation needs of a regenerating  
494 liver.

495 Previous studies have indicated that distinctly located pools of mature hepatocytes with  
496 progenitor-like features serve specialized roles in liver regeneration (Miyajima et al., 2014).  
497 Although hepatocytes expressing stem/progenitor-like markers such as LGR5<sup>+</sup>, SOX9<sup>+</sup>, AXIN2<sup>+</sup>,  
498 TERT<sup>+</sup>, or MFSD2A<sup>+</sup> are detectable, their overall requirement for normal maintenance and  
499 renewal after acute or chronic liver damage is debatable (Font-Burgada et al., 2015; Huch et al.,  
500 2013; Lin et al., 2018; Lu et al., 2015; Pu et al., 2016; Wang et al., 2015). For instance, a series  
501 of recent reports questioned the notion of a dedicated regenerative cell population and they  
502 demonstrated that randomly distributed hepatocytes throughout the lobule repopulate the liver  
503 under both homeostatic and/or injury conditions (Chen et al., 2020; Matsumoto et al., 2020; Sun  
504 et al., 2020). Our single-cell transcriptomic data are consistent with these recent reports as we  
505 did not detect enrichment for any of these markers in the proliferating pool of hepatocytes.  
506 Instead, we found that after PHx, a subset of remaining hepatocytes dedifferentiates to an early  
507 postnatal-like state before proceeding towards the proliferative trajectory. The conflicting  
508 observations of earlier studies could have arisen due to different lineage-tracing models,  
509 methods of hepatocellular injury, and/or severity of the disease. As certainly, when the liver is  
510 severely damaged and hepatocyte proliferation compromised, other cells with progenitor-like  
511 characteristics can transdifferentiate into hepatocytes to reconstitute the liver (Lu et al., 2015;  
512 Michalopoulos and Khan, 2015; Raven et al., 2017).

513 Our understanding of molecular events that induce mature, quiescent hepatocytes to  
514 dedifferentiate and transition into a proliferative state is incomplete. In this study, we combined  
515 systematic analyses of gene regulatory networks and intercellular interactions via ligand-  
516 receptor signaling on a compensatory model of regeneration (PHx) in an otherwise healthy liver.  
517 In the future, it will be important to determine whether the hepatocyte subpopulations identified

518 here reprogram similarly or differently in response to other types of periportal and/or pericentral  
519 liver injuries. This information is crucial to fully discern the regenerative mechanisms or lack  
520 thereof in the context of human liver disease. The use of cutting-edge spatial transcriptomics  
521 methods that correlate gene expression profiles with histology data from the same/consecutive  
522 tissue sections should provide additional information on the local heterogeneity of liver cell  
523 subpopulations and their roles in regeneration. Lately, single-cell studies have surveyed the  
524 changes in cell-cell communication between healthy, NASH, and fibrotic livers (Dobie et al.,  
525 2019; Xiong et al., 2019). Comparing these disease datasets to the compendium of intercellular  
526 interactions documented here would broaden our understanding of normal versus aberrant cell-  
527 cell communication networks, revealing defects in intrahepatic cell signaling that compromise  
528 regeneration in diseased livers. Such lines of investigations will not only map the signaling events  
529 that regulate hepatocellular plasticity but also help identify targets that may be leveraged to  
530 optimize hepatic repair and function after acute liver failure or in end-stage liver disease.

## 531 **MATERIALS AND METHODS**

### 532 **Animal care and surgeries**

533 Eight-twelve week-old male mice were used for all experimental procedures. National  
534 Institutes of Health (NIH) and UIUC institutional guidelines for the use and care of laboratory  
535 animals were followed, and all experimental protocols were performed as approved by the  
536 Institutional Animal Care and Use Committee at the University of Illinois, Urbana-Champaign  
537 (UIUC). Mice were housed in 12 h light-dark cycle with standard chow diet (Teklad Global 18%  
538 Protein Rodent Diet) and water provided *ad libitum*. We performed a 2/3<sup>rd</sup> partial-hepatectomy  
539 (PHx) procedure adapted from previously reported protocols (Boyce and Harrison, 2008; Mitchell  
540 and Willenbring, 2008). Briefly, a bilateral subcostal abdominal incision was made on the skin of  
541 the anesthetized (continuous isoflurane inhalation, 2%) animal to expose the abdominal  
542 musculature. 4/0-silk ligatures were then placed across the superior gastric vessels positioned  
543 vertically on either side of the xiphoid process to minimize blood loss from the peritoneal wall.  
544 Following this, a bilateral incision was made on the abdominal wall to expose the liver. The left  
545 lateral and median lobes were ligated and excised. Following this, the peritoneum was closed  
546 with a continuous 5/0 silk suture, and the skin was closed using 7 mm reflex clips. The  
547 anesthesia was then removed, and the mouse allowed to recover on a pre-warmed heating pad.  
548 To minimize post-surgical discomfort, Carprofen (5 mg/kg) was administered subcutaneously as  
549 an analgesic immediately after surgery.

### 550 **Immunofluorescence staining**

551 EdU labeling and immunofluorescence staining were carried out as described before  
552 (Bangru et al., 2018). 5-Ethynyl-2'-deoxyuridine (EdU) was administered intraperitoneally  
553 (100 $\mu$ g/g body weight) four hours before tissue collection to label nascent DNA synthesis.  
554 Harvested liver tissue was fixed in 10% neutral buffered formalin for 24 hours and embedded in

555 paraffin. 5  $\mu$ m thick sections were cut, deparaffinized in xylene, rehydrated and antigen retrieved  
556 in citrate buffer (10 mM sodium citrate, 0.05% Tween 20, pH 6.0). The sections were washed  
557 with wash buffer (Tris-buffered saline with 0.05% Triton X-100) and blocked for two hours at  
558 room temperature in blocking buffer (10% normal goat serum + 1% BSA in TBS). To visualize  
559 EdU-labelled DNA, Alexa Fluor 488 was conjugated to EdU using Click-iT EdU Alexa Fluor Kit  
560 (Thermo Fisher) as per the manufacturer's instructions. Anti-HNF4A antibody (Abcam, C11F12)  
561 was then applied to the sections at 1:500 dilution and incubated overnight at 4 °C. Following  
562 this, the sections were washed with washing buffer and incubated at room temperature for one  
563 hour with Alexa Fluor 588 conjugated secondary antibody. Nuclei were then stained with ToPro3  
564 (1  $\mu$ M in PBS) for 15 mins at room temperature. CC/Mount aqueous mounting media (Sigma)  
565 was used to mount and coverslip the sections before imaging on a Zeiss LSM 710 microscope.

## 566 **Liver function tests**

567 Retro-orbital punctures were used to collect whole blood from mice into Capiject gel/clot  
568 activator tubes. The serum was isolated by centrifugation at 8500g for 10 min and stored at  
569 -80 °C until further analysis. Serum chemistry analysis for ALT and AST levels were performed  
570 using commercial assay kits (Infinity Kits, Thermo Scientific) according to the manufacturer's  
571 protocols. GraphPad Prism 6 was used to perform statistical analysis (One-way ANOVA) and  
572 prepare graphical representations.

## 573 **Tissue dissociation and isolation of liver cells**

574 We adapted protocols from previously published reports to dissociate and collect whole-  
575 cell suspension from the liver. While the animal was anesthetized through continuous inhalation  
576 of 2% isoflurane, a 5 cm long incision was made in the abdomen to expose the portal vein and  
577 inferior vena cava. To perfuse the liver, the portal vein was cannulated, and ~30 ml of solution  
578 I (1x HBBS without  $\text{Ca}^{2+}/\text{Mg}^{2+}$  with 1 mM EDTA, 37 °C) was passed followed by ~40-50 ml of

579 solution II (HBSS with 0.54  $\mu$ M CaCl<sub>2</sub>, 40  $\mu$ g/ml Trypsin Inhibitor, 15 mM HEPES PH 7.4 and  
580 6000 units of collagenase IV, 37 °C). The liver was excised and massaged in washing solution  
581 (DMEM + Ham's F12 (50:50) with 5% FBS and 100 U/ml Penicillin/Streptomycin, 4 °C) to release  
582 cells from the liver capsule. The cell suspension was then passed through 40  $\mu$ m filter to remove  
583 doublets/undigested tissue chunks, pelleted by centrifugation at 350xg for 4 min at 4 °C to  
584 remove debris and resuspended in 15 ml wash buffer. Cells were counted with an automated  
585 hemocytometer, and ~1-1.5 million cells were pelleted and processed for library preparation.

### 586 **Dead cell removal, single cell library preparation and sequencing**

587 MACS Dead Cell Removal Kit (Miltenyl Biotec) was used according to the manufacturer's  
588 protocol to remove dead cells and obtain unbiased single-cell suspensions of liver cells with high  
589 viability. Following this, single-cell sequencing libraries were prepared individually from each  
590 time point using the 10X Genomics Chromium Single Cell 3' Kit v3 and sequenced with Illumina  
591 NovaSeq 6000 on a SP/S4 flow cell to obtain 150bp paired reads.

### 592 **Raw sequencing data processing and cell-type identification**

593 Single-cell libraries produced over four billion reads. We used Cell Ranger v3.1 pipelines  
594 from 10X Genomics to align reads and produce feature barcode matrices. Seurat v3.1 (Butler et  
595 al., 2018) was used for QC and analysis of individual feature barcode matrices were further  
596 integrated after removing batch-specific effects using BEER v0.1.7 (Zhang et al., 2019). Data  
597 was log-normalized, scaled, and clustered after PCA analysis. Hepatocyte and NPC clusters  
598 were identified based on the expression of various known marker genes. To identify cell types  
599 within the subset of NPCs, they were further subjected to unsupervised UMAP clustering.

### 600 **Pseudo-temporal trajectory analysis**

601 Monocle v2.0 was used to perform pseudotime analysis, according to the online  
602 documentation (Qiu et al., 2017b; 2017a; Trapnell et al., 2014). The CellDataSet class monocle

603 objects were made from log-normalized Seurat object containing the cells under consideration.  
604 Dimensionality reduction was performed using the DDRTree algorithm, and the 3000 most  
605 significant differentially expressed genes were used as ordering genes to perform pseudotime  
606 ordering, to obtain cell trajectories. Genes with expression patterns co-varying with pseudotime  
607 were determined by the 'differentialGeneTest()' module, clustered and plotted using the  
608 'plot\_pseudotime\_heatmap()' module. Expression patterns in clusters were distinguished as  
609 upregulated/downregulated along the pseudotime, and gene ontology analysis was performed  
610 using DAVID 6.8 (Dennis et al., 2003) to identify biological pathways that are up or  
611 downregulated along the pseudotime.

## 612 **Pathway scoring**

613 Relative scores of biological pathways were assessed with the CellCycleScoring() module  
614 in Seurat v3.1. Pathway terms and exhaustive lists of candidate genes for each pathway were  
615 obtained from the Rat Genome Database (RGD) (Smith et al., 2020). The summary heatmap  
616 was generated using Seurat v3.1, considering all pathways with at least 50 genes. Box plots to  
617 demonstrate cell cycle and pathway scores were constructed using ggplot2, and pairwise  
618 comparison with reference using a T-test was performed with the ggpubr package.

## 619 **Gene regulatory network analysis**

620 SCENIC pipeline (Aibar et al., 2017) was used to estimate the AUCell Score activity matrix from  
621 the log-normalized Seurat object containing the subset of hepatocytes. Unlike the standard  
622 SCENIC workflow where this AUCell score activity matrix is binarized by thresholding to  
623 generate binary regulon-activity matrix, we retained the full AUCell score for all further analysis.  
624 UMAP plots, heatmaps and violin plots demonstrating regulon activities based on AUCell scores  
625 were made in Seurat 3.1. AUCell scores were plotted over pseudotime cell-trajectories using  
626 Monocle 2.0.



## 627 **Imputation and Cell-cell communication analysis**

628           ScRNA-seq data often contains dropouts or missing values due to failure in the detection  
629 of RNAs (Kharchenko et al., 2014). In our dataset, we noticed that NPCs have lower UMIs  
630 relative to hepatocytes, and could potentially have dropouts leading to incomplete  
631 representations. Hence, imputation using the MAGIC algorithm (van Dijk et al., 2018) was  
632 performed to correct for any missing values in the NPC dataset before interpreting cell-cell  
633 interactions. We constructed cell-cell communication networks and performed statistics of  
634 interactions using methods previously described in detail by Farbehi et al. (Farbehi et al., 2019).  
635 Briefly, we used a directed and weighted network with four layers of nodes, namely, the *source*  
636 cell populations expressing the ligands, the *ligands* expressed by the source populations, the  
637 *receptors* targeted by the ligands, and the *target* cell populations. Weights of edges that connect  
638 '*source to ligand*' and '*receptors to target*' were computed as Log2 fold change in expression of  
639 ligand/receptor in source/target compared to remaining cells. Ligand-receptor interactions were  
640 determined using a mouse-specific ligand-receptor interaction dataset compiled previously  
641 ((Farbehi et al., 2019). The sum of weights along the path was used to calculate path weights  
642 connecting a source to target through a ligand:receptor interaction. Cells were grouped  
643 according to cell types, and hepatocytes were subdivided based on cellular states. We used all  
644 ligand:receptor connections with a minimum pathweight of 1.5 and calculated the overall weight,  
645  $w_{s:t}$ , as the sum of all pathweights between the corresponding source and target. Only edges  
646 with Benjamini-Hochberg adjusted P-values,  $P_w < 0.01$  were considered significant. Further, we  
647 constructed ligand:receptor interaction dot plots using ggPlot2.

## 648 **DATA AVAILABILITY**

649           All raw RNA-seq data files are available for download from NCBI Gene Expression  
650 Omnibus (<http://www.ncbi.nlm.nih.gov/geo/>) under accession number GSE151309.



651 **ACKNOWLEDGEMENTS**

652 Work in the Kalsotra laboratory is supported by National Institute of Health (R01HL126845,  
653 R01AA010154), Muscular Dystrophy Association (MDA514335), Planning Grant Award from the  
654 Cancer Center @ Illinois, and the Beckman Fellowship from the Center for Advanced Study at  
655 the University of Illinois Urbana-Champaign. U.V.C. is supported by the Herbert E. Carter  
656 fellowship in Biochemistry, UIUC. S.B is supported by the NIH Tissue microenvironment training  
657 program (T32-EB019944). We acknowledge support from the Transgenic mouse core, High-  
658 throughput sequencing and genotyping core and Histology-microscopy core facilities.

659 **AUTHOR CONTRIBUTIONS**

660 U.V.C., S.B. and A.K. conceived the project and designed the experiments. U.V.C. and S.B.  
661 performed experiments and analyzed the data. M.H. provided guidance with bioinformatics  
662 analyses. U.V.C., S.B. and A.K. interpreted results and wrote the manuscript. All authors  
663 discussed the results and edited the manuscript.

664 **COMPETING INTERESTS**

665 The authors declare no competing financial interests.

666 Requests for materials should be sent to A.K. at [kalsotra@illinois.edu](mailto:kalsotra@illinois.edu)

667

## FIGURE 1

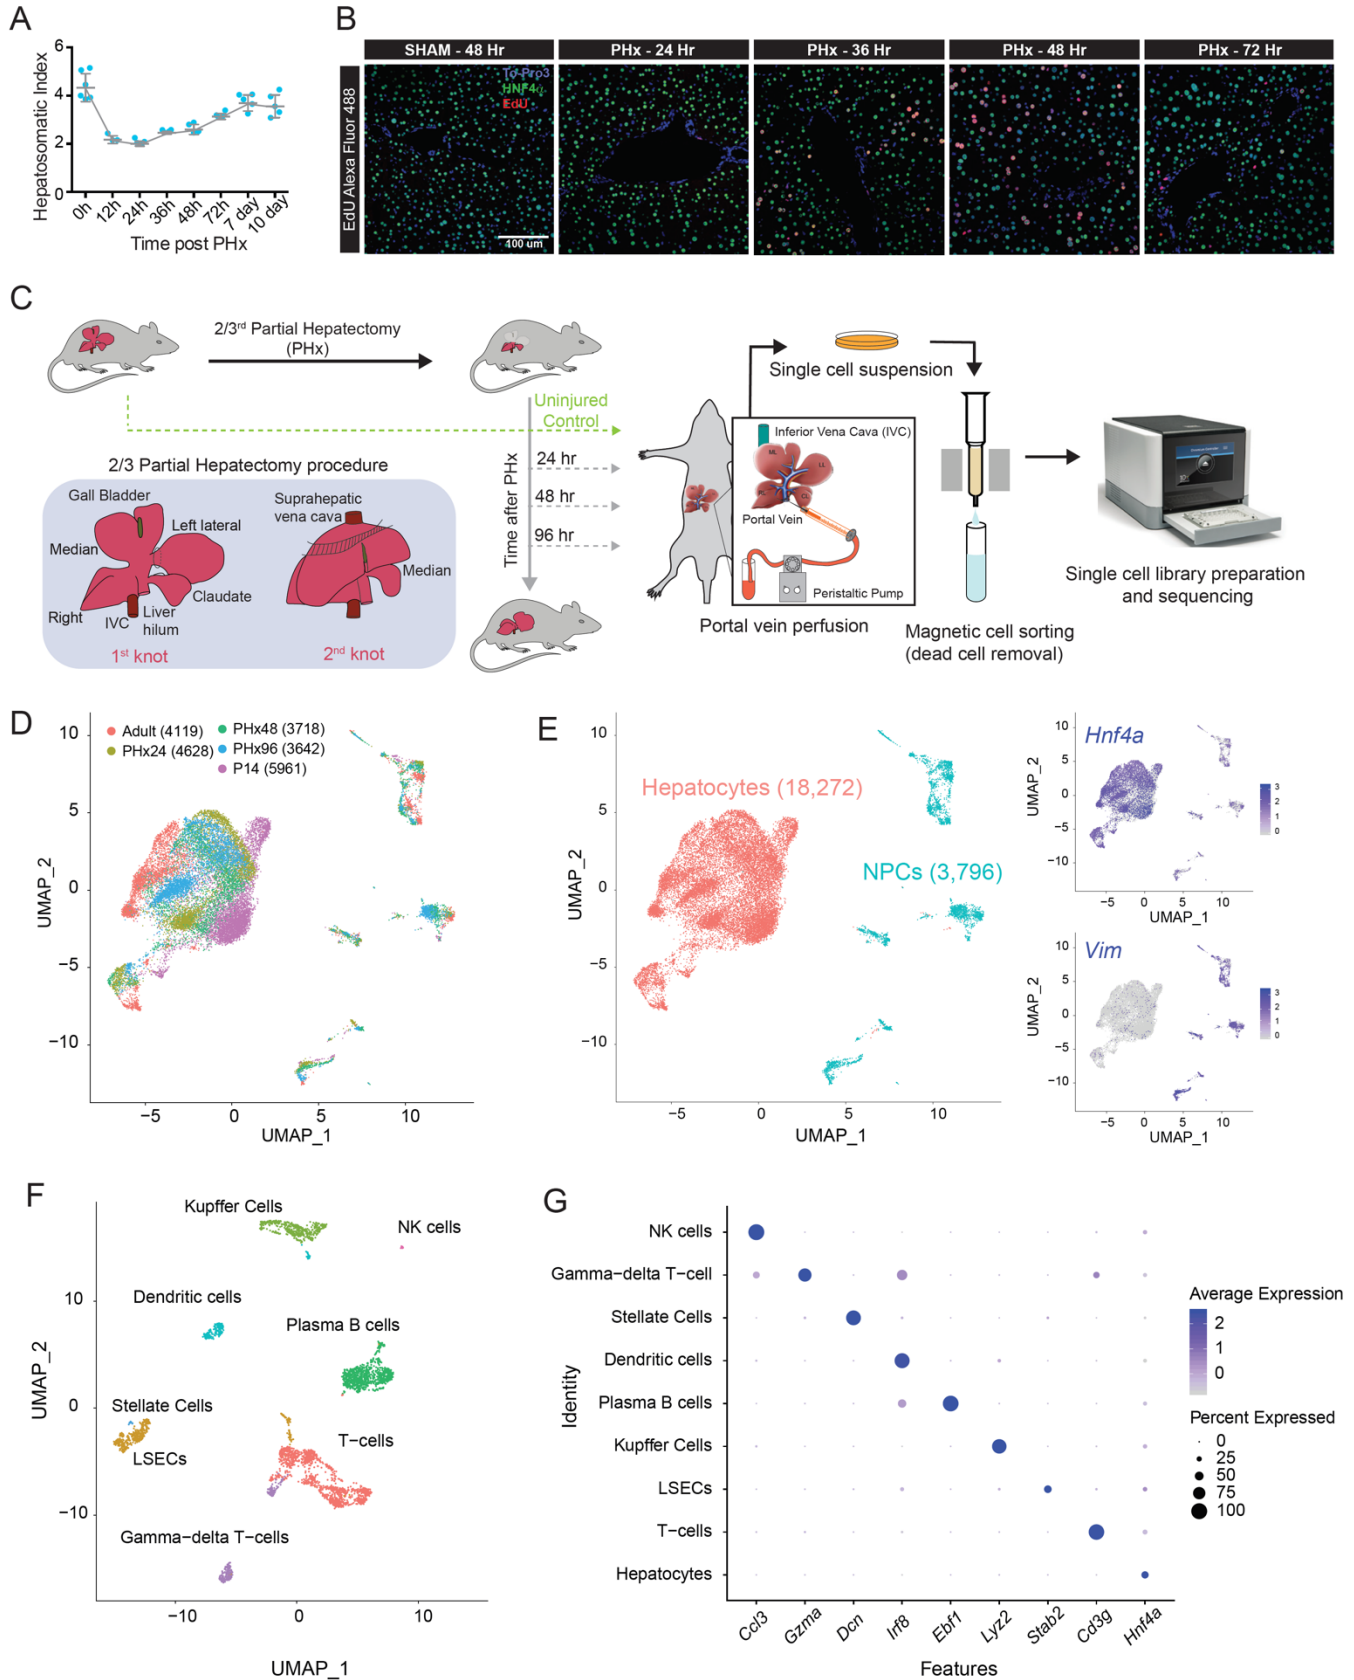

668 **Figure 1: Single cell analysis of resident hepatic cell populations from immature, adult**  
669 **and regenerating mouse livers**

- 670 **A.** Time course plot showing the restoration of liver-to-bodyweight ratio after partial  
671 hepatectomy (PHx). The liver recovers its original mass within 7 days after PHx. ( n = 5  
672 animal per group)
- 673 **B.** Fluorescent imaging of hepatocyte proliferation measured by *in vivo* EdU incorporation in  
674 post-PHx and Sham livers. White arrows indicate proliferating hepatocytes (Co-labeled  
675 for HNF4 $\alpha$  in green, incorporated EdU in red, and nuclei in blue). Images taken under  
676 20X resolution are shown.
- 677 **C.** Overview schematic demonstrating workflow for isolation of mouse liver cells for single-  
678 cell RNA sequencing (scRNA-seq). Portal vein perfusion of collagenase containing buffer  
679 was used to isolate single liver cells from P14 pups, sham adults, as well as mice at 24  
680 h, 48 h and 96 h after 2/3<sup>rd</sup> PHx. Single cell library preparation was performed with whole  
681 cell suspensions individually for each mouse using 10X Chromium Single Cell 3' Reagent  
682 Kit (V3 chemistry) after Magnetic-activated cell sorting to remove dead cells. The inset  
683 details our PHx procedure, showing the position of two knots before excision of the  
684 respective liver lobes.
- 685 **D.** Combined UMAP clustering of all 22,068 cells identified after QC cutoffs and batch  
686 correction. Cells are colored by the batch of origin and the total number of cells identified  
687 from each batch are given in brackets.
- 688 **E.** Identification of hepatocyte and Non-parenchymal cell (NPC) subpopulations. Seurat  
689 based clustering followed by marker gene analysis revealed broad epithelial and non-  
690 epithelial cellular identities. Feature plots shown as insets show higher expression of  
691 expression of *Hnf4a* (a hepatocyte marker) and *Vim* (a non-epithelial marker) specially in  
692 populations identified as hepatocytes and NPCs respectively.
- 693 **F.** Combined UMAP clustering analysis of all NPC subpopulation. Analysis of known cell-  
694 specific marker genes revealed the identities of each cluster as a distinct NPC cell type.
- 695 **G.** Dot plot showing expression of cell-type specific marker genes for each cell-type identified  
696 in the integrated dataset. The size of each dot encodes the percentage of cells expressing  
697 that marker within the identity class (cell type) and the color encodes the average  
698 expression of a gene among all cells within that class.

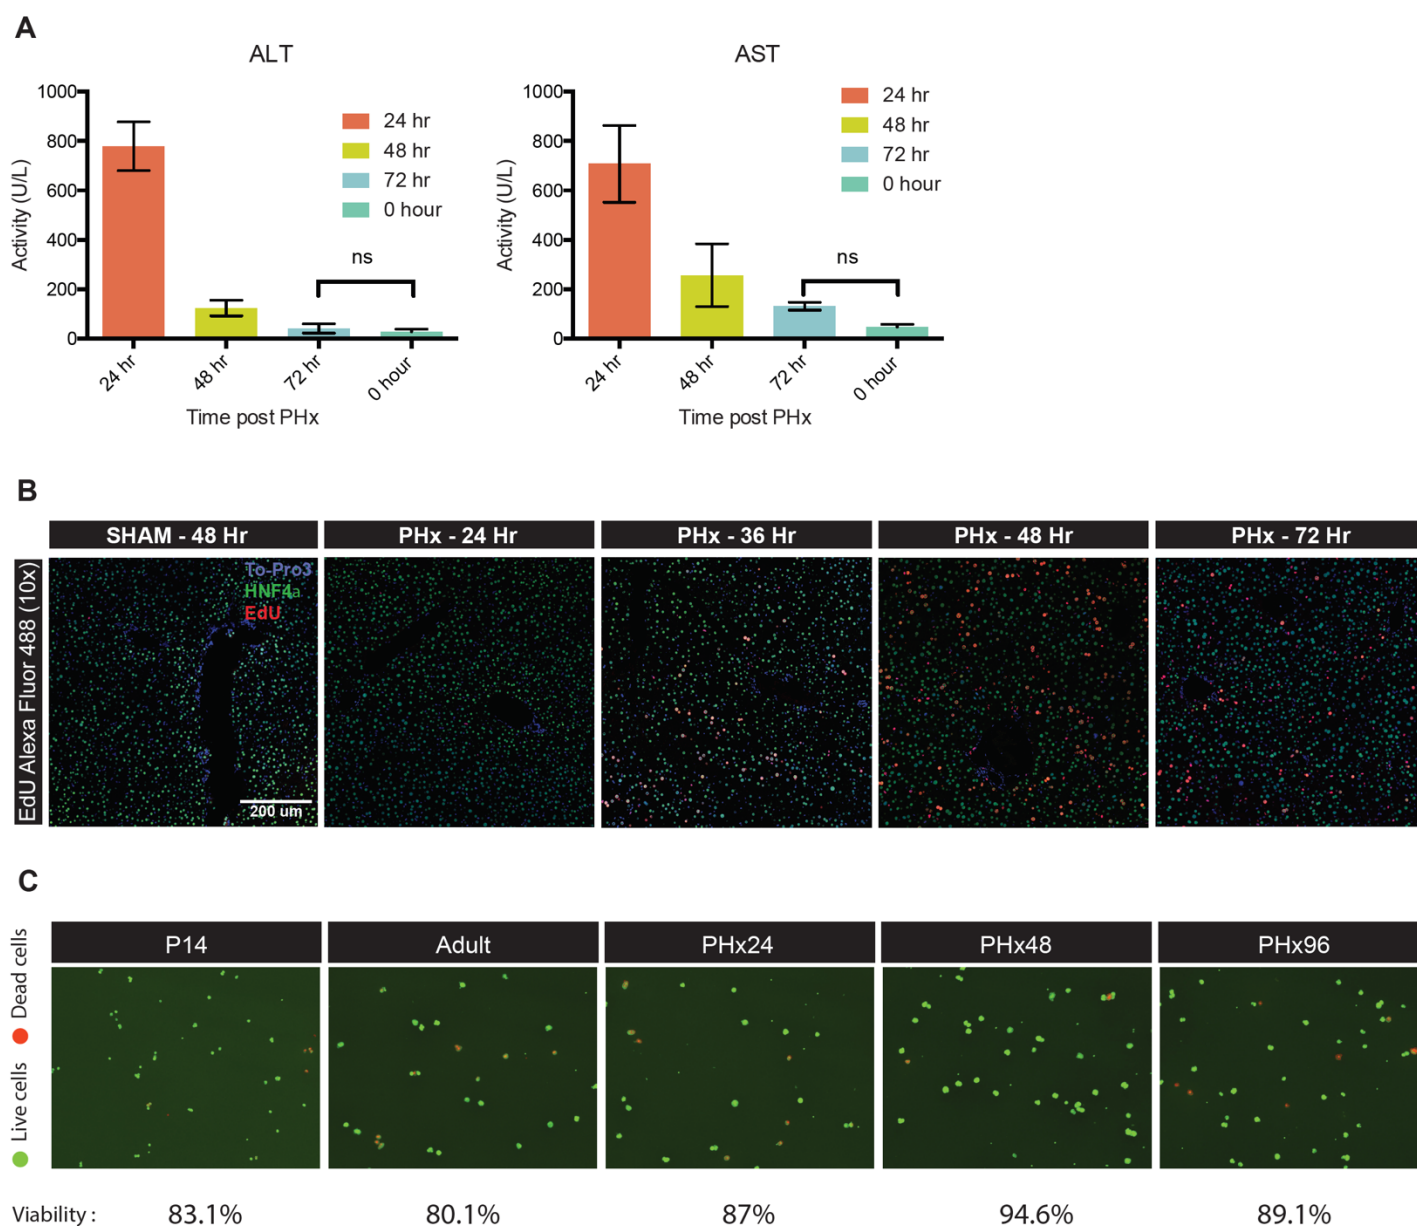

**Figure 1—figure supplement 1. (A)** ALT and AST levels 24 hours, 48 hours, 72 hours post-PHx and 0 hr(control SHAM mice). Levels of serum injury markers (ALT and AST) are restored to normal levels within 72 hours after PHx. Data are mean  $\pm$  s.d. \* $P < 0.05$ , ns: not significant, (n = 3 animals per group) **(B)** Fluorescent imaging of hepatocyte proliferation measured by in vivo EdU incorporation in post-PHx and SHAM livers. White arrows indicate proliferating hepatocytes (Co-labeled for Hnf4 $\alpha$  in green, incorporated EdU in red, and nuclei in blue). Images taken under 10X resolution are shown. **(C)** Fluorescent imaging of hepatocytes indicating the viability of cells used for scRNA-seq. Dead/dying cells are stained in red (Propidium Iodide) and viable cells are stained in green (Acridine Orange). Percentage viability was calculated by Nexcelom Cellometer is also shown.

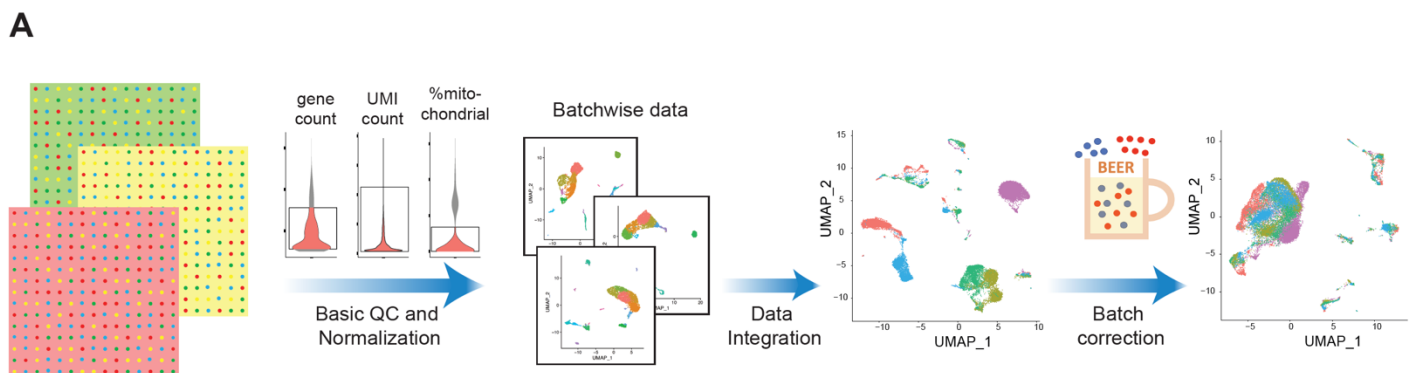

**B**

|                         | Adult | PHx24 | PHx48 | PHx96 | P14  |
|-------------------------|-------|-------|-------|-------|------|
| Min cells               | 10    | 10    | 10    | 10    | 10   |
| Min Features(genes)     | 1000  | 800   | 500   | 1000  | 500  |
| Max Features(genes)     | 3000  | 3000  | 3000  | 3000  | 3000 |
| % mitochondrial content | 30    | 30    | 30    | 30    | 30   |

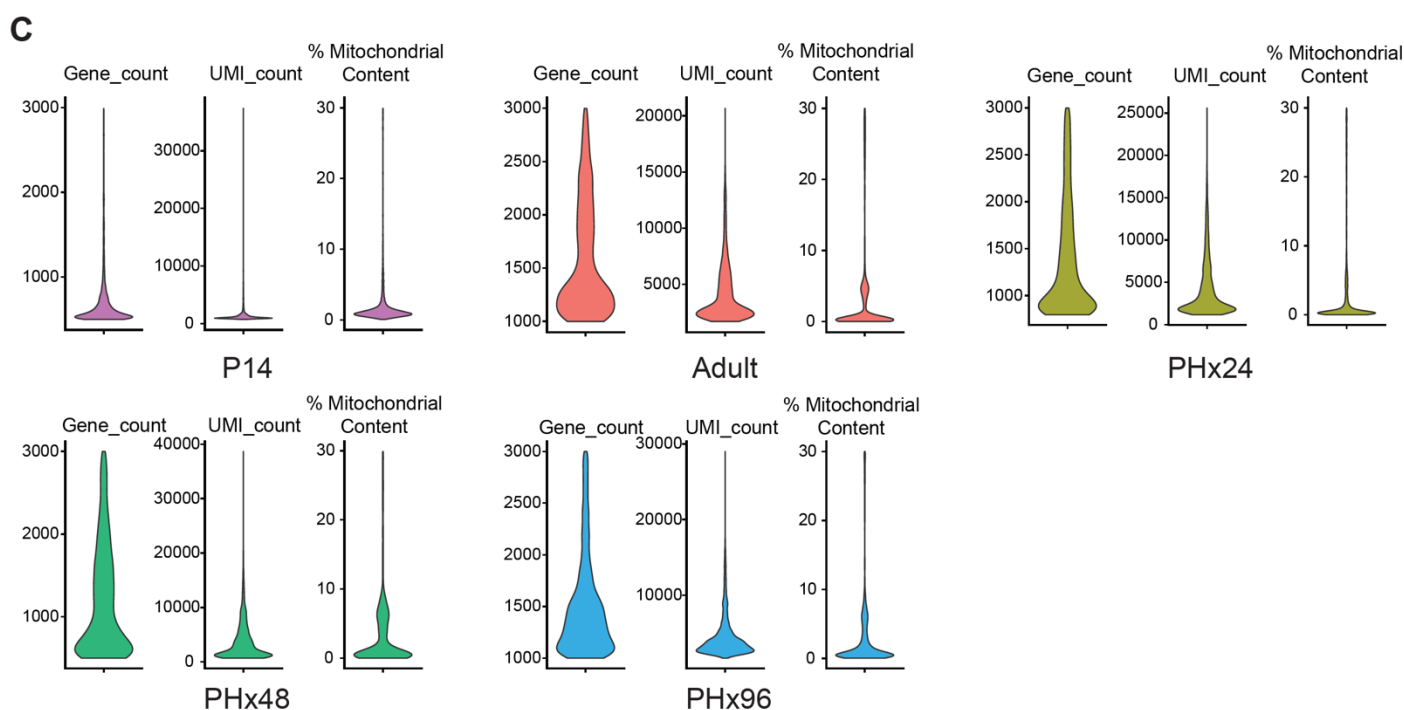

**Figure 1—figure supplement 2. (A)** Computational workflow depicting data processing and analysis pipeline for scRNA-seq data. Cell Ranger was used to align raw reads and generate feature-barcode matrices from scRNA-seq output for each sample. Seurat v3.1 was used to perform basic QC (see suppl. Table) and normalization, after which data was integrated using BEER to remove extraneous batch specific effects. **(B)** Table showing Quality Check (QC) cutoffs applied on raw reads from scRNA-seq data prior to the analysis. **(C)** Violin plots showing the distribution of gene counts, UMI counts and % mitochondrial content in P14, Adult, PHx24, PHx48 and PHx96 samples, after applying QC cutoffs listed above to scRNA-seq data. These set of cells were used for all downstream analysis.



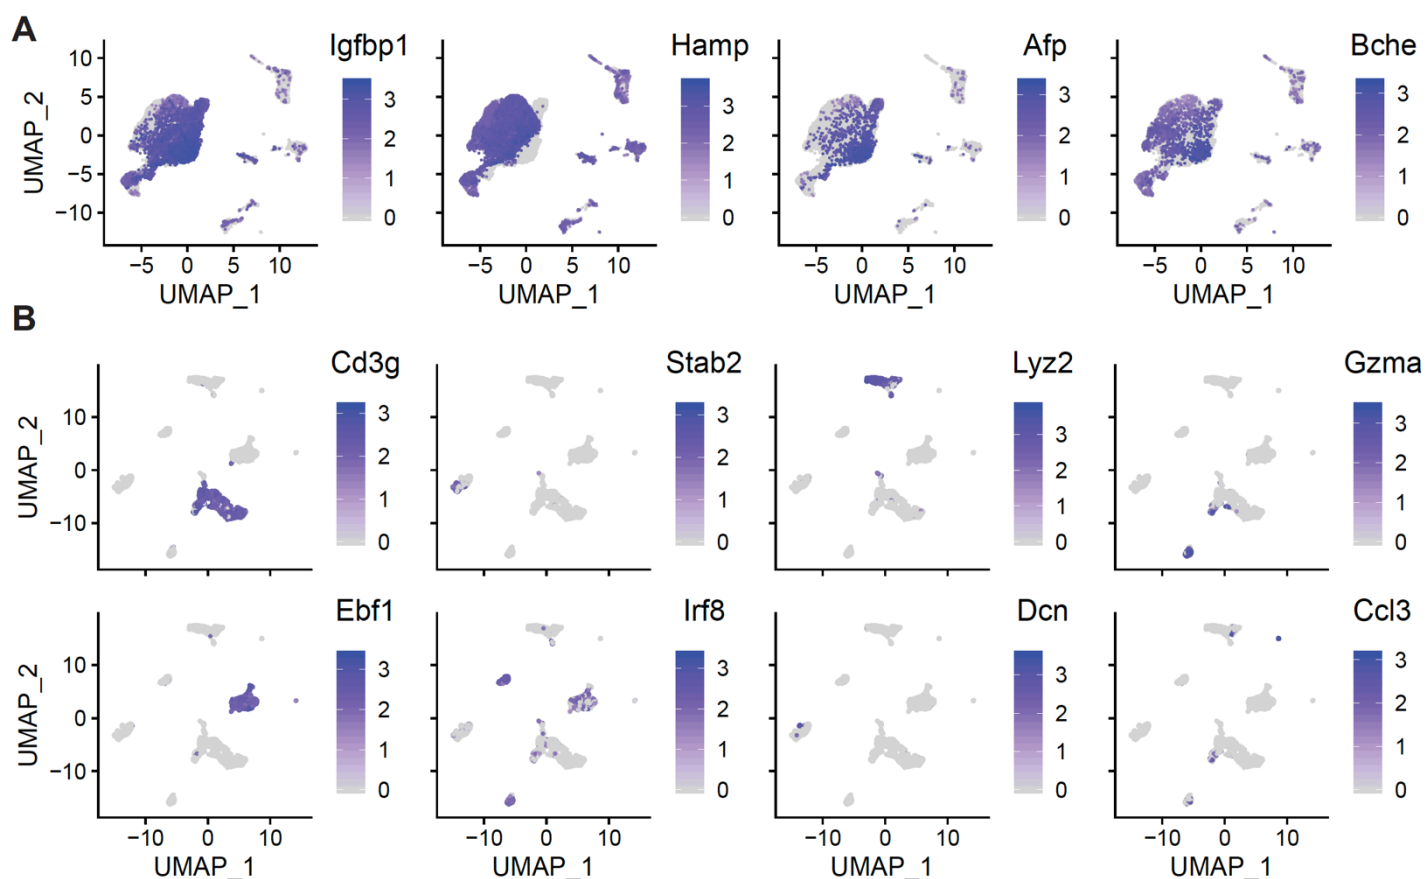

**Figure 1—figure supplement 3. (A)** UMAP plots representing the expression of hepatocyte-specific genes. **(B)** NPC subpopulation UMAP plots representing the expression of genes specific to different NPC populations identified. Cells in (A) and (B) are colored by the expression levels of the indicated gene, as calculated with Seurat V3.1.

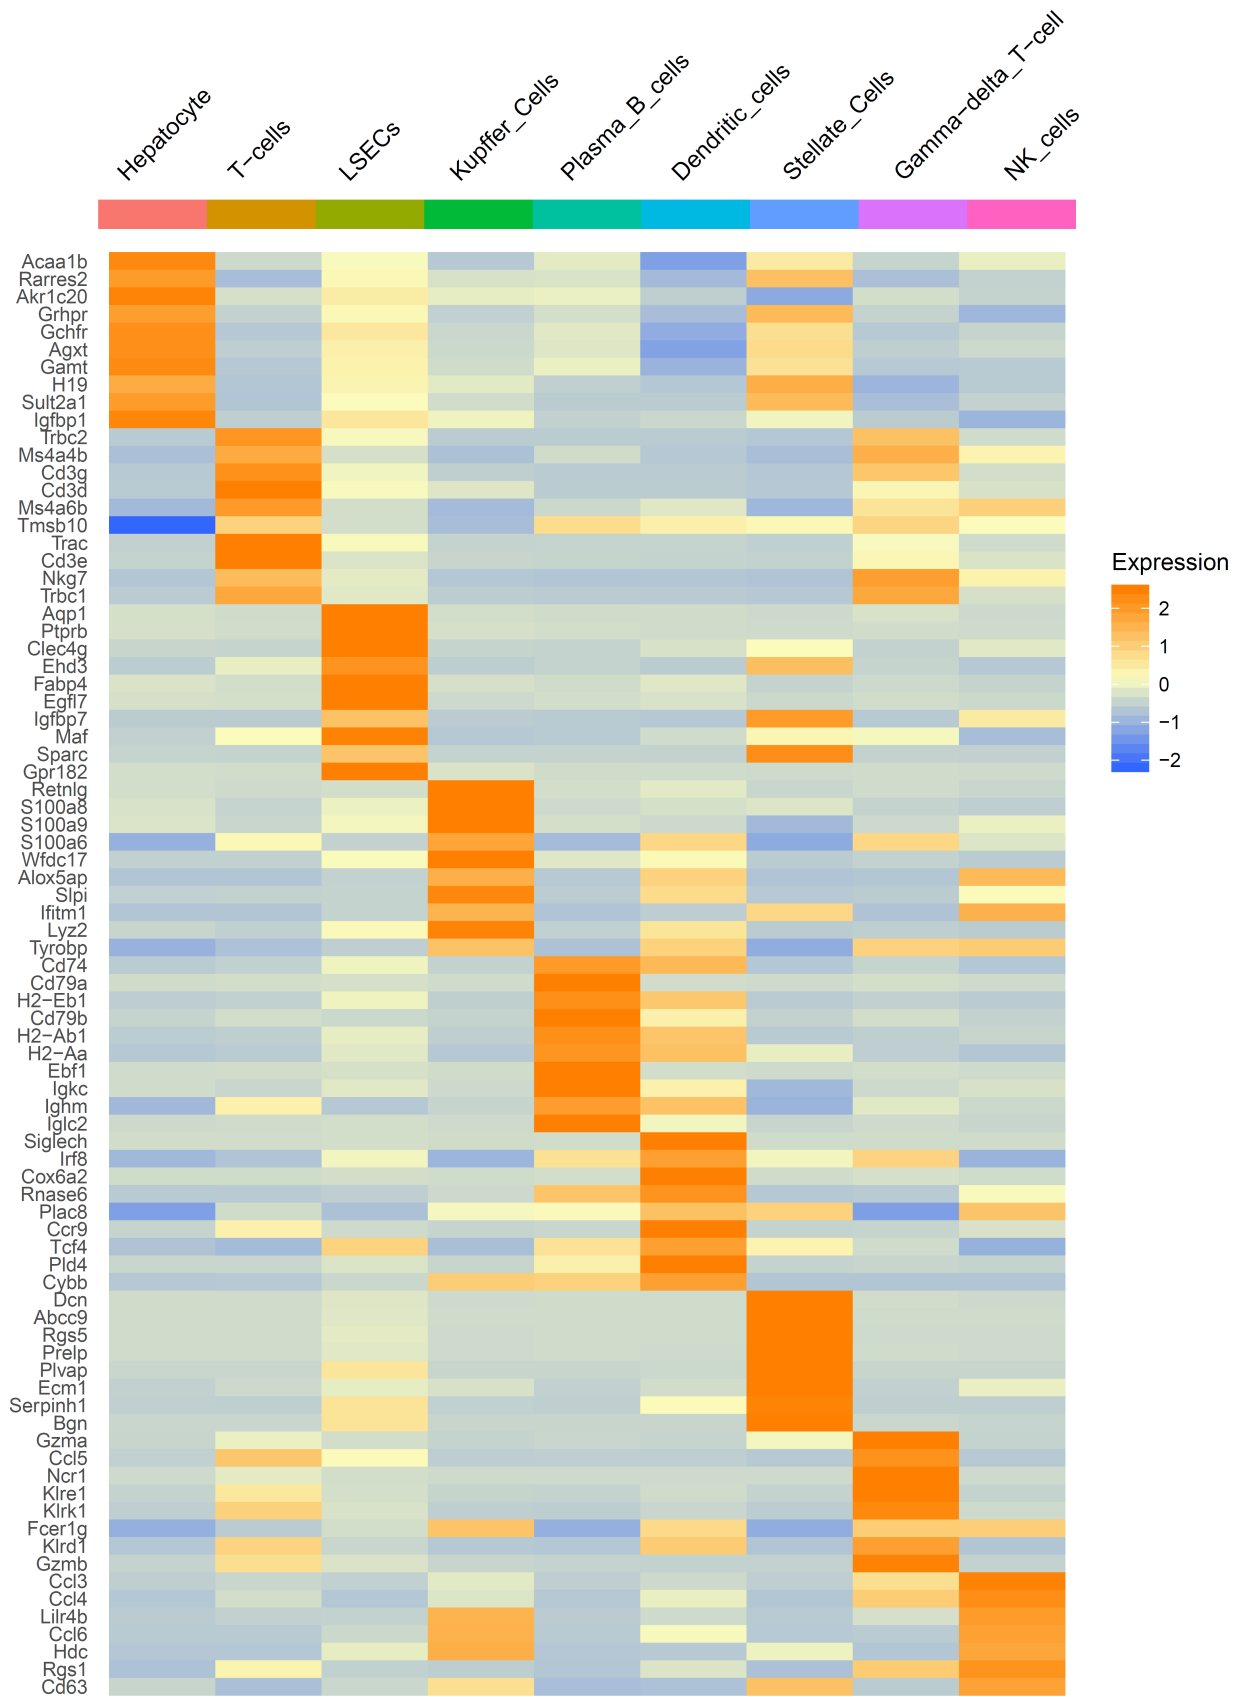

**Figure 1—figure supplement 4.** Heatmap showing top genes that were enriched (>2 fold) in each cell type cluster. Scale bar shows relative gene expression.

699

## FIGURE 2

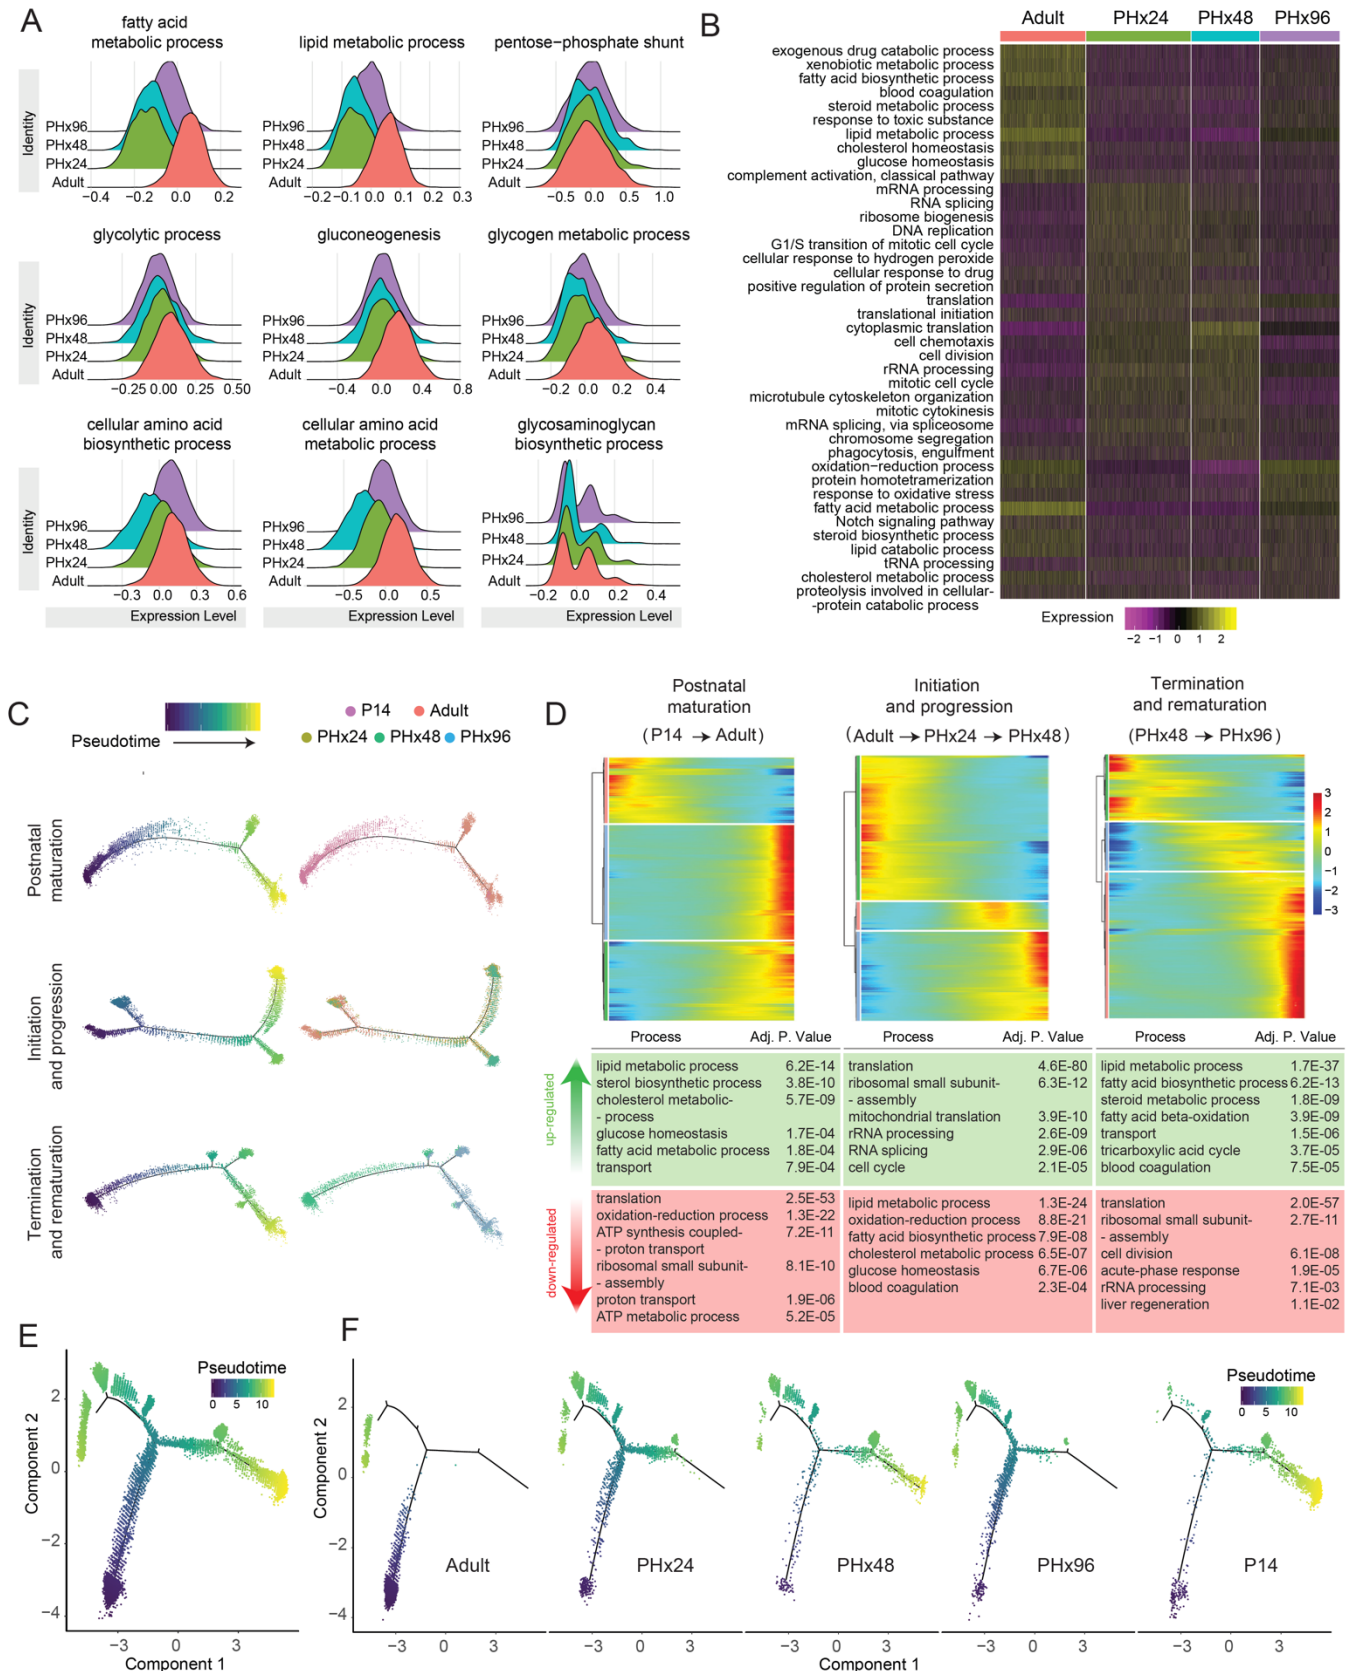



700 **Figure 2: Specific hepatocyte population reversibly reprograms to an immature post-natal**  
701 **like state during regeneration.**

- 702 **A.** Ridge plots showing relative scoring on hepatocyte subpopulation using Seurat3.1  
703 demonstrate extensive rewiring of metabolic genes during regeneration. Relative scores  
704 were computed based on the lists of genes for each pathway obtained from the Rat  
705 Genome Database (RGD).
- 706 **B.** Heatmap showing relative scores of top differentially-regulated metabolic pathways.
- 707 **C.** Pseudotime plots demonstrating cellular trajectories during postnatal maturation  
708 (including P14 and adult hepatocytes), initiation and progression (including adult, PHx24  
709 and PHx48 hepatocytes), and termination and rematuration (including PHx48 and PHx96  
710 hepatocytes). Single cell trajectories were constructed and pseudotime values calculated  
711 using Monocle 2. Trajectories are colored by pseudotime (left) and sample identity (right).
- 712 **D.** Heatmaps representing modules of genes that co-vary along the pseudotime during  
713 postnatal maturation, initiation–progression, and termination–rematuration phases.  
714 DAVID based gene ontology (GO) analysis revealed reversible reprogramming of  
715 developmentally regulated gene expression programs essentially revert postnatal  
716 maturation, and this is followed by transitions that reinstate mature hepatic program. Top  
717 upregulated and downregulated GO terms are described below the respective heatmaps.
- 718 **E.** Pseudotime plot indicating cellular trajectories of hepatocytes from all samples. Single  
719 cell trajectories were constructed and pseudotime values were calculated using Monocle  
720 2. Trajectories are colored by pseudotime.
- 721 **F.** Pseudotime plots showing distribution of each sample along combined cellular  
722 trajectories shown in (C). The adult and P14 hepatocytes present strikingly distinct  
723 distribution along the trajectory, however, the distribution shifts towards P14 at PHx24-48  
724 and back towards the adult at PHx96.

725

### FIGURE 3

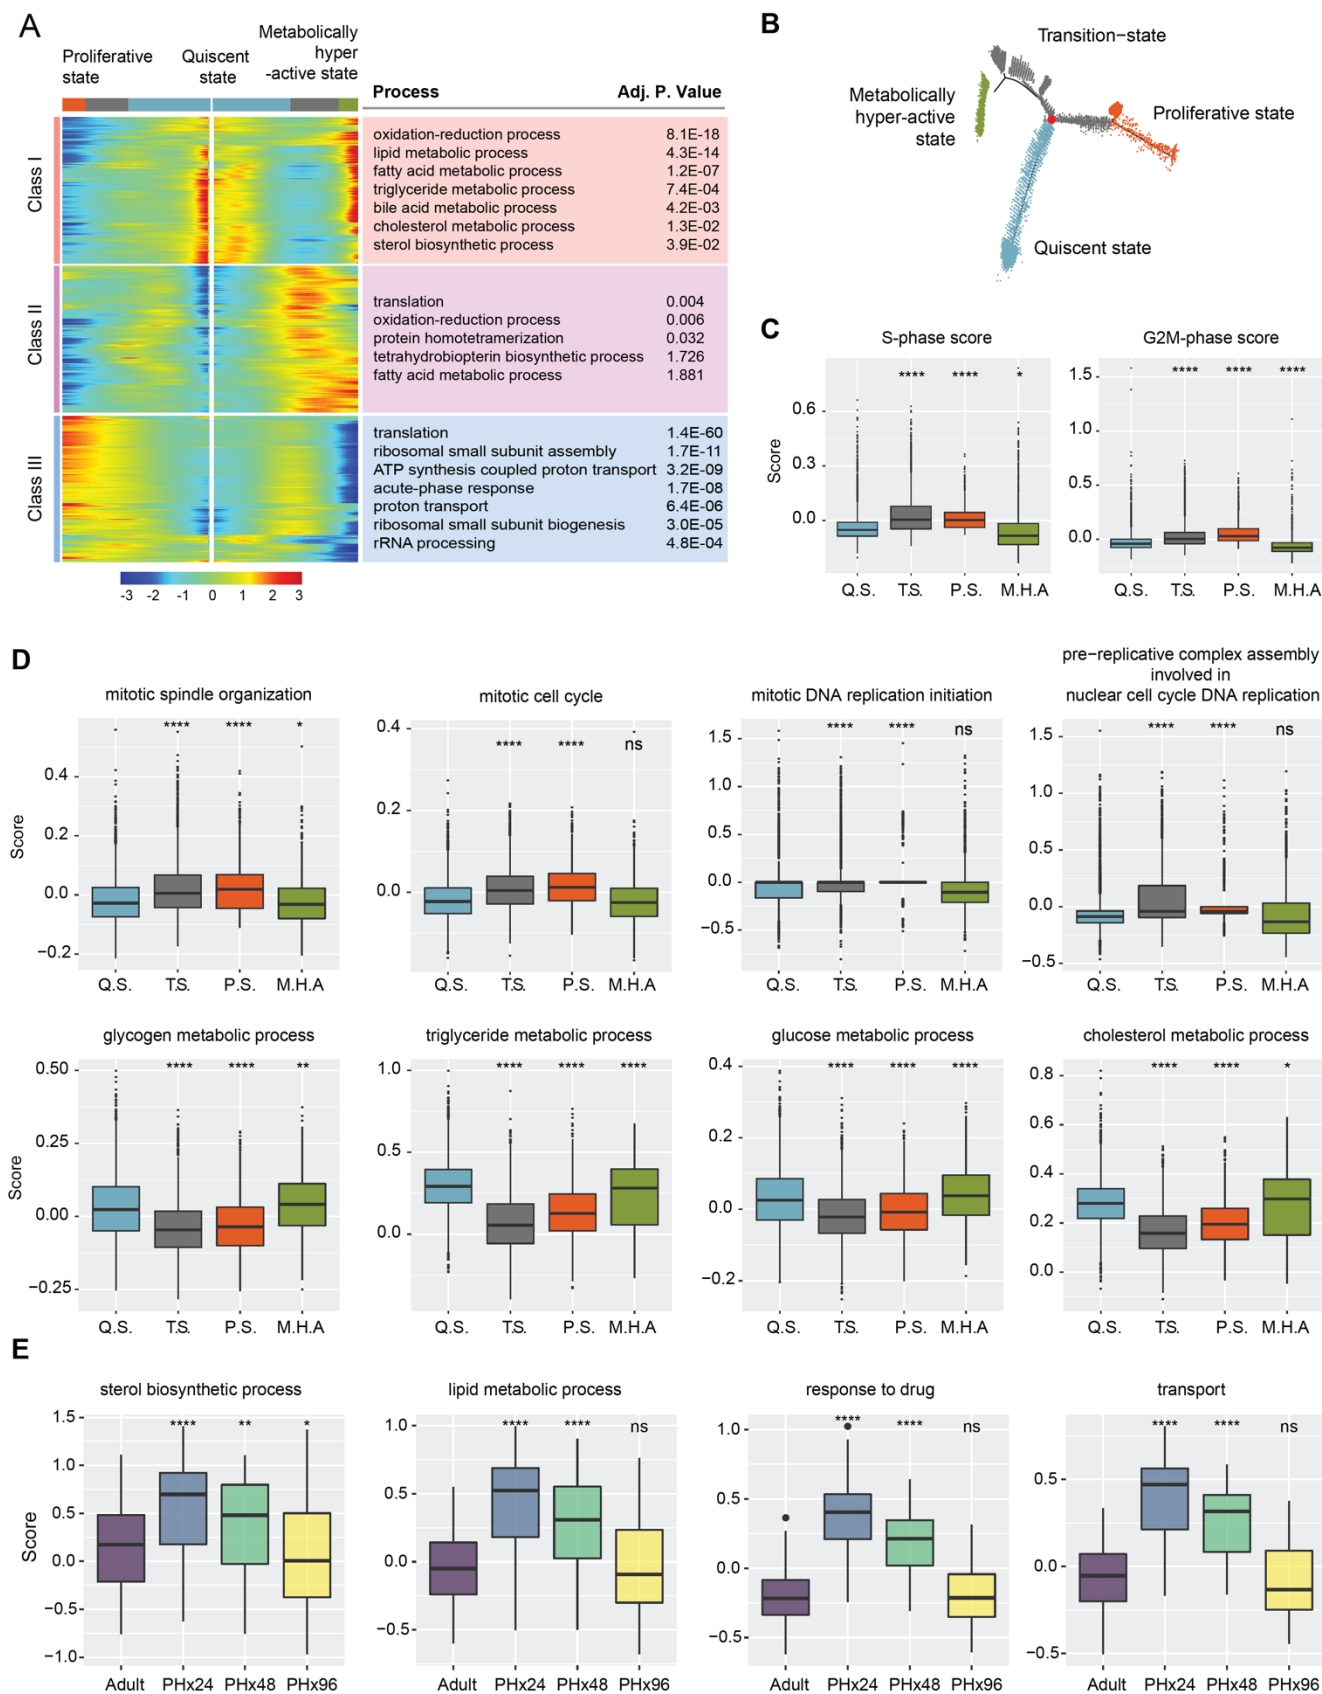

726 **Figure 3: Bifurcation of hepatocyte trajectory during regeneration produces hepatocytes**  
727 **enriched with complementary functions in proliferation and metabolism.**

728 **A.** Heatmap showing bifurcating of gene expression programs executed along the  
729 pseudotime after branching. Top GO terms enriched in each class of genes are listed with  
730 their corresponding adjusted P-values.

731 **B.** Trajectory demonstrating the three distinct states of hepatocytes. Branch point under  
732 evaluation is shown in red.

733 **C.** Box plots demonstrating cell cycle phase scores calculated from Seurat3.1 for  
734 hepatocytes belonging to different states. Q.S. is quiescent state, T.S. is transition state,  
735 P.S. is proliferating state, and M.H.A. is metabolically hyperactive state. P-values were  
736 derived from a parametric t-test (unpaired). \* $p \leq 0.05$ , \*\*\*\* $p \leq 0.0001$

737 **D.** “Proliferating’ and ‘metabolically-hyperactive’ states uniquely upregulate proliferation- or  
738 metabolism-related functions, respectively. Box plots showing relative scoring of  
739 indicated pathways in hepatocytes belonging to different states. P-values were derived  
740 from a parametric t-test (unpaired). \* $p \leq 0.05$ , \*\* $p \leq 0.01$ , \*\*\*\* $p \leq 0.0001$ , ns:  $p > 0.05$ .

741 **E.** Metabolically-hyperactive state transiently upregulates metabolism-related functions  
742 during regeneration. Violin plot showing time point based scoring of hepatocytes from  
743 the metabolically hyperactive state for the indicated pathways. P-values were derived  
744 from a parametric t-test (unpaired). \* $p \leq 0.05$ , \*\* $p \leq 0.01$ , \*\*\*\* $p \leq 0.0001$ , ns:  $p > 0.05$ .

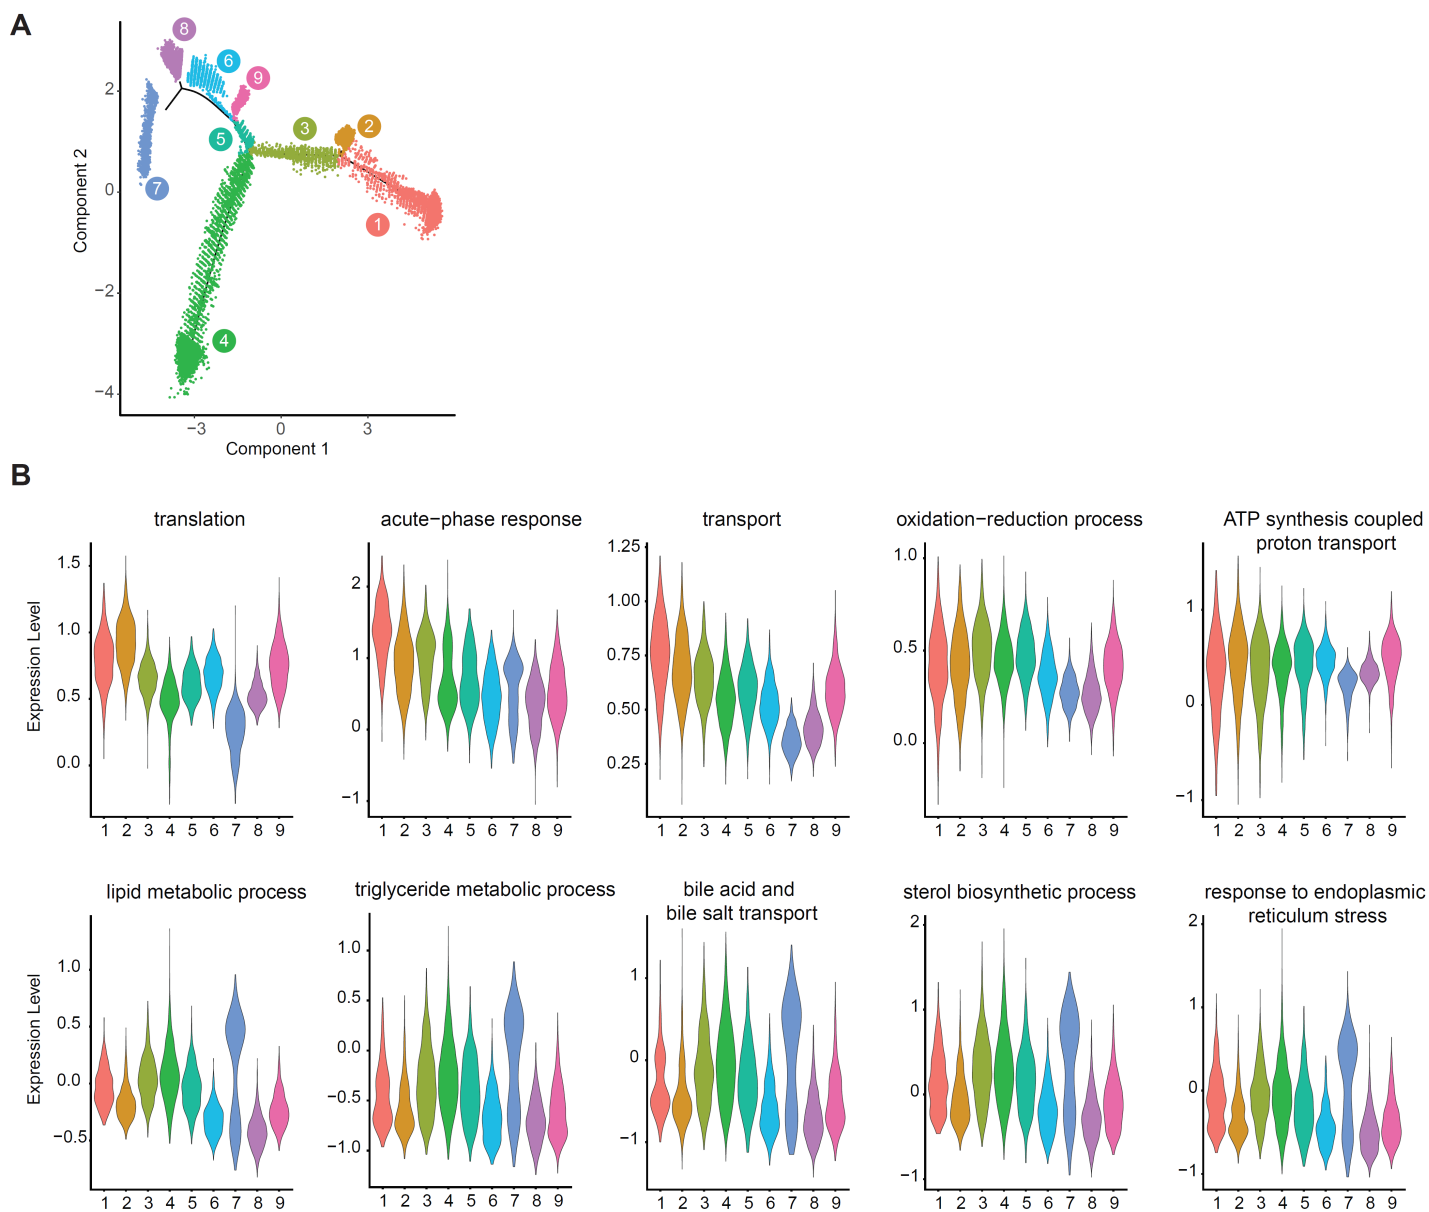

**Figure 3—figure supplement 1. (A)** DDRTree trajectory showing the nine states identified by Monocle2 along the pseudotime trajectory for hepatocytes from all timepoints. **(B)** Violin plot showing relative scoring (using Seurat3.1) for top ontology categories differentially regulated (with respect to the trajectory bifurcation) during regeneration for hepatocytes belonging to states identified in **A**.

745

FIGURE 4

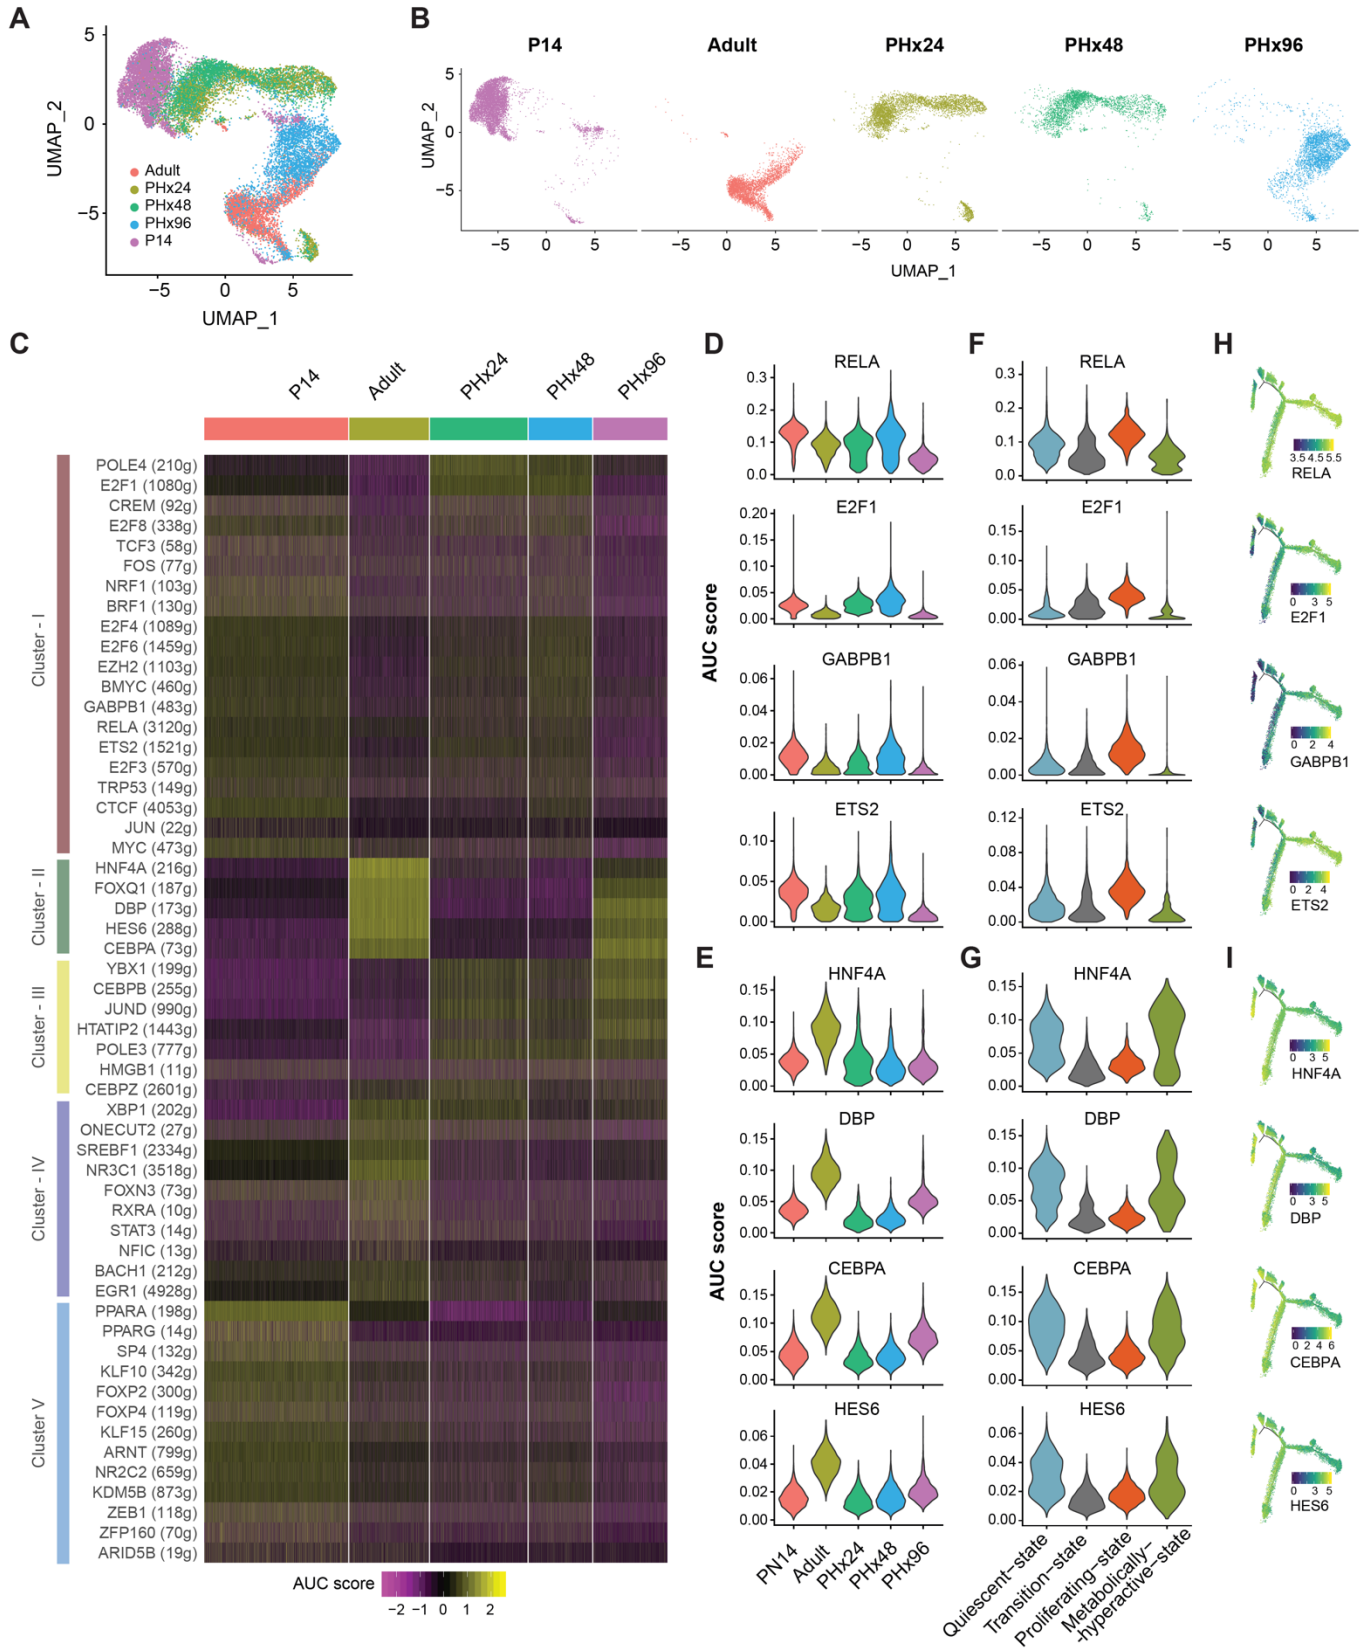

746 **Figure 4: Gene regulatory networks are rewired to a postnatal-like-state during**  
747 **regeneration.**

- 748 **A.** UMAP clustering of all hepatocytes based on the AUC scores for each regulon calculated  
749 with SCENIC. Cells are colored according to the sample of origin.
- 750 **B.** AUC score based UMAP clustering, grouped according to the sample of origin. Cells are  
751 colored according to sample of origin. Adult and PHx96 hepatocytes cluster together,  
752 whereas PHx24 and PHx48 hepatocytes cluster together with P14 hepatocytes.
- 753 **C.** Heatmap depicting the activities of different regulons that show time point-dependent  
754 variations.
- 755 **D.** Violin plot showing distribution of AUC scores for RELA, E2F1, GABP1 and ETS2  
756 regulons across hepatocytes from each time point demonstrating their high activity in  
757 PHx24, PHx48 and P14 hepatocytes.
- 758 **E.** Violin plots showing distribution of AUC scores for HNF4A, DBP, CBPA and HES6  
759 regulons across hepatocytes from each time point demonstrating their high activity in  
760 adult and PHx96 hepatocytes.
- 761 **F.** Violin plots showing distribution of AUC scores of representative regulons across  
762 hepatocytes showing their upregulation in proliferative state.
- 763 **G.** Violin plots showing distribution of AUC scores of representative regulons across  
764 hepatocytes showing their upregulation in quiescent and metabolically active states.
- 765 **H.** Pseudotime plots of hepatocyte cellular trajectories colored by the AUC scores of  
766 representative regulons showing high activity in the proliferative state.
- 767 **I.** Pseudotime plots of hepatocyte cellular trajectories colored by the AUC scores of  
768 representative regulons showing high activity in quiescent and metabolically active states.



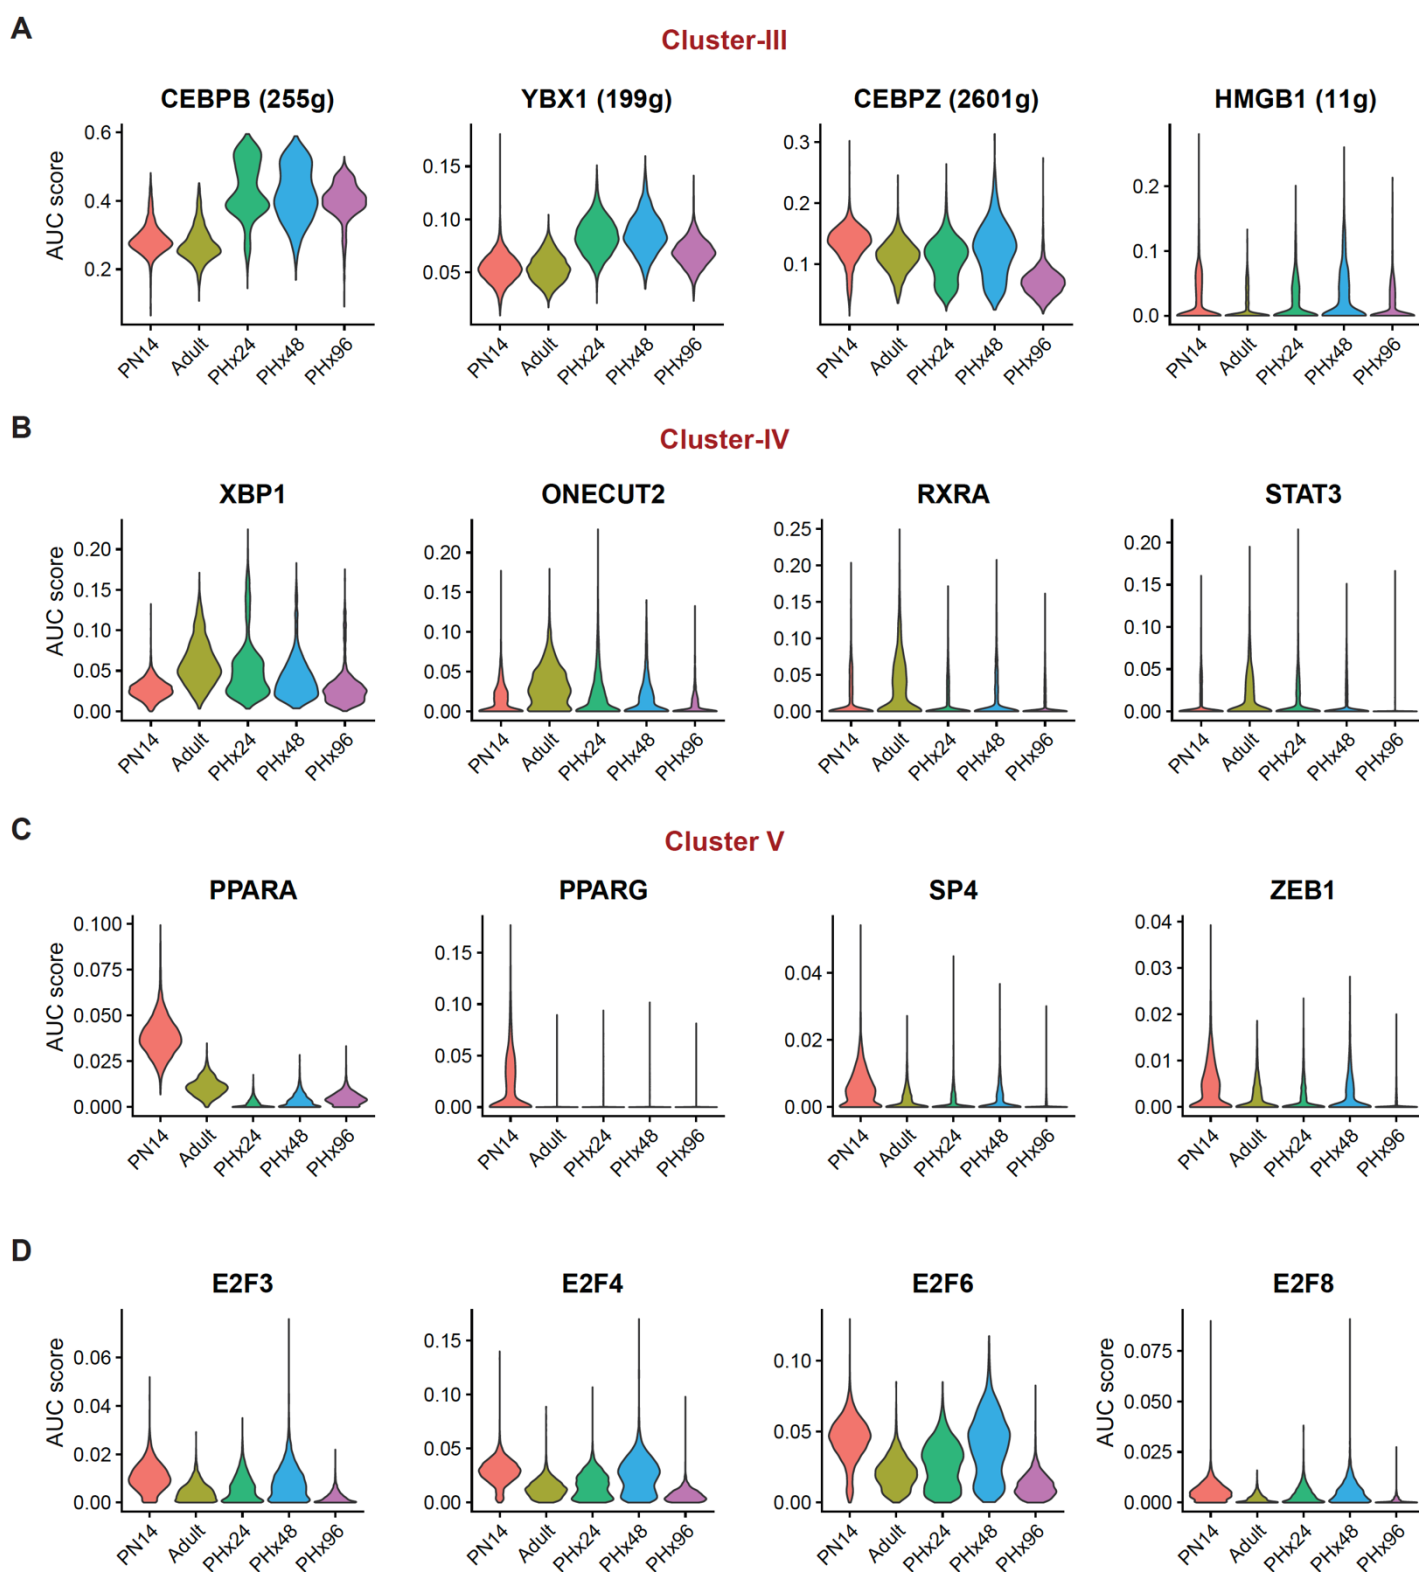

**Figure 4—figure supplement 1.** Violin plots showing AUC-score distribution within hepatocytes at different time points, for the regulons belonging to (A) Cluster III (B) Cluster IV (C) Cluster V, and (D) various E2F transcription factors.



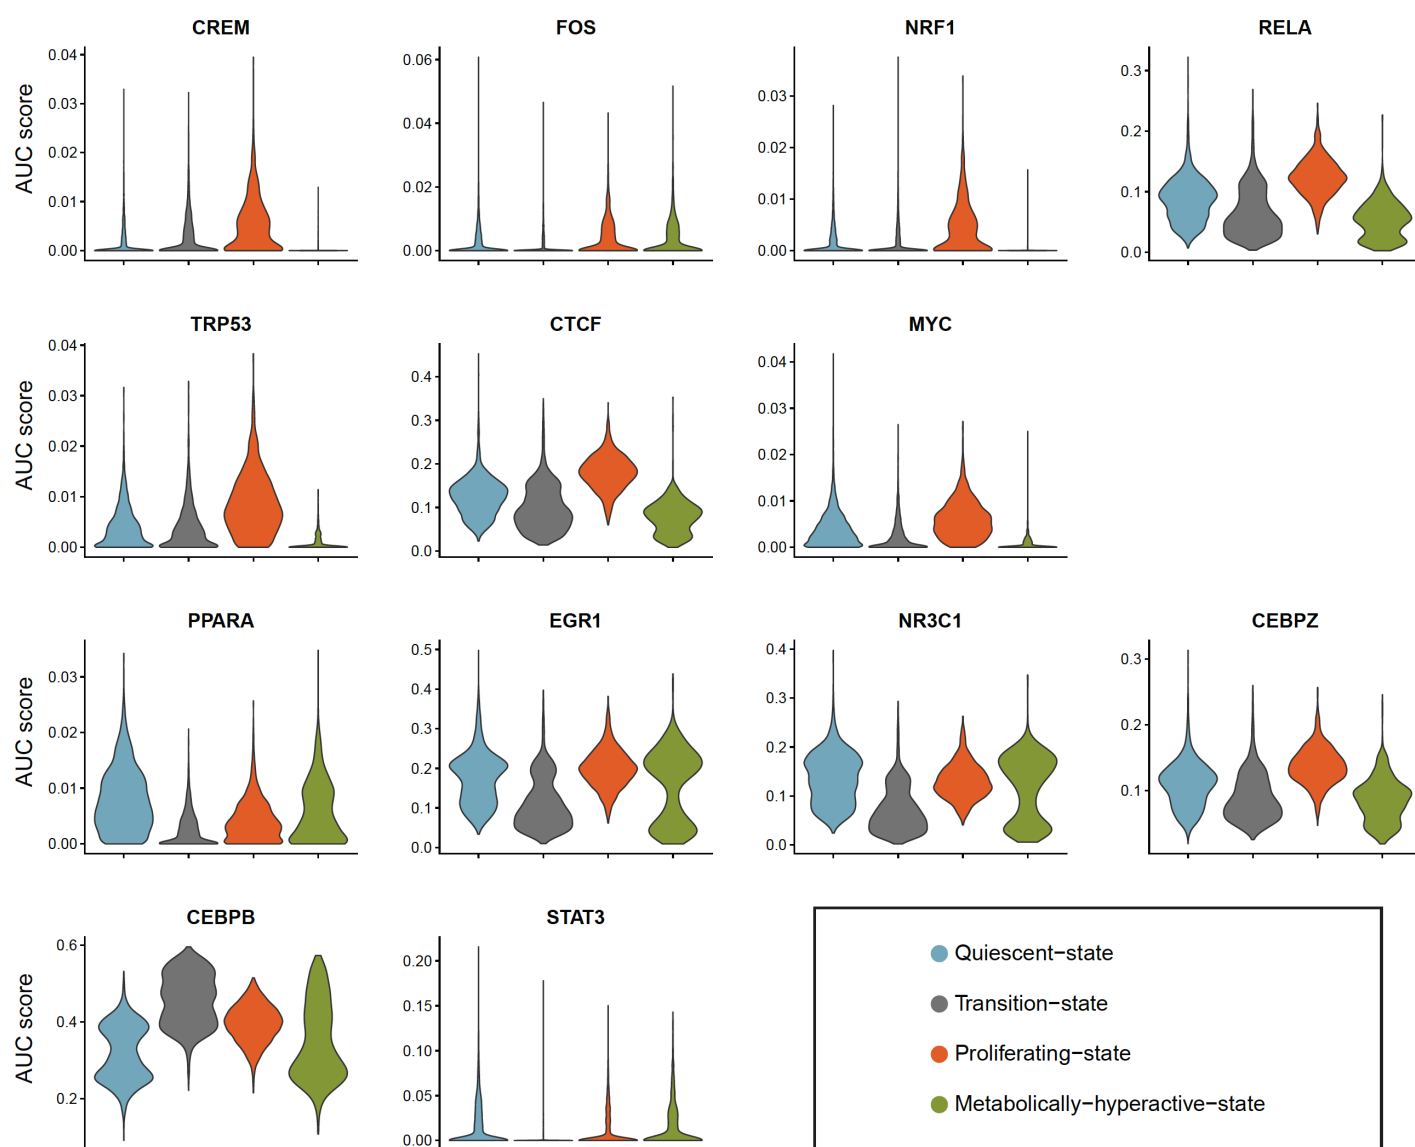

**Figure 4—figure supplement 2.** Violin plots showing state-wise distribution of regulon AUC-scores within hepatocytes.

769

## FIGURE 5

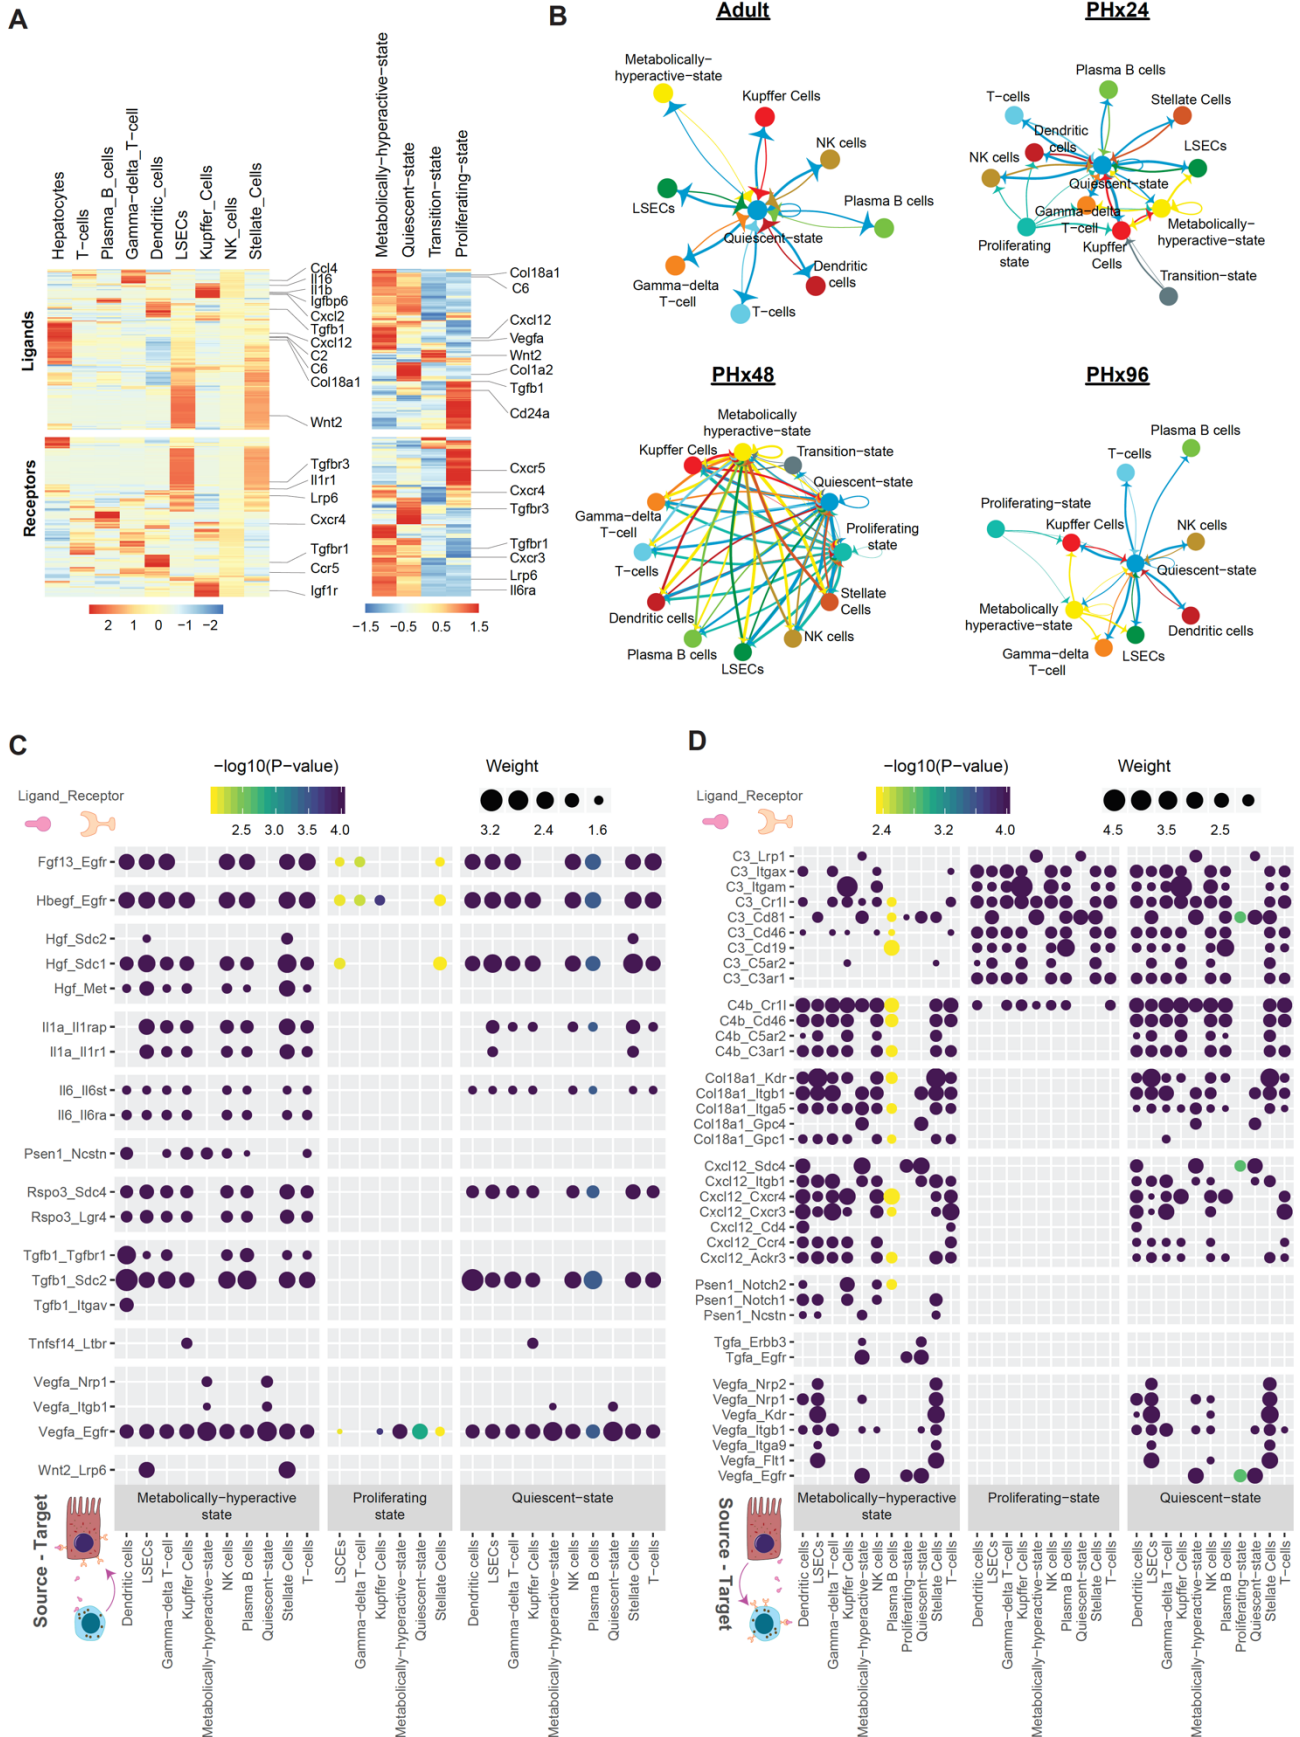

770 **Figure 5: Cell-cell interactions landscape dynamics during post-PHx regenerative**  
771 **response.**

- 772 **A.** Heatmap showing expression of various ligand molecules and cellular receptors from  
773 different liver cell types (left) and from hepatocytes belonging to different cell states (right).  
774 **B.** Network diagrams showing cell-cell interactions indicated by arrows (edges) pointing in  
775 the source to target direction. Thickness indicates the sum of weighted paths between  
776 populations, and the color of arrows corresponds to the source. Network diagrams for  
777 Adult, PHx24, PHx48 and PHx96 are shown.  
778 **C.** Dot plot of representative inbound signals to hepatocytes at PHx48. Size of each dot  
779 indicates the weight of the corresponding ligand-receptor interaction and the color  
780 indicates negative  $\log_{10}$  P-value of the source-to-target interaction. Empirical p-values  
781 were calculated and Benjamini-Hochberg correction was performed.  
782 **D.** Dot plot of representative outbound signals from hepatocytes to various liver cells at  
783 PHx48.

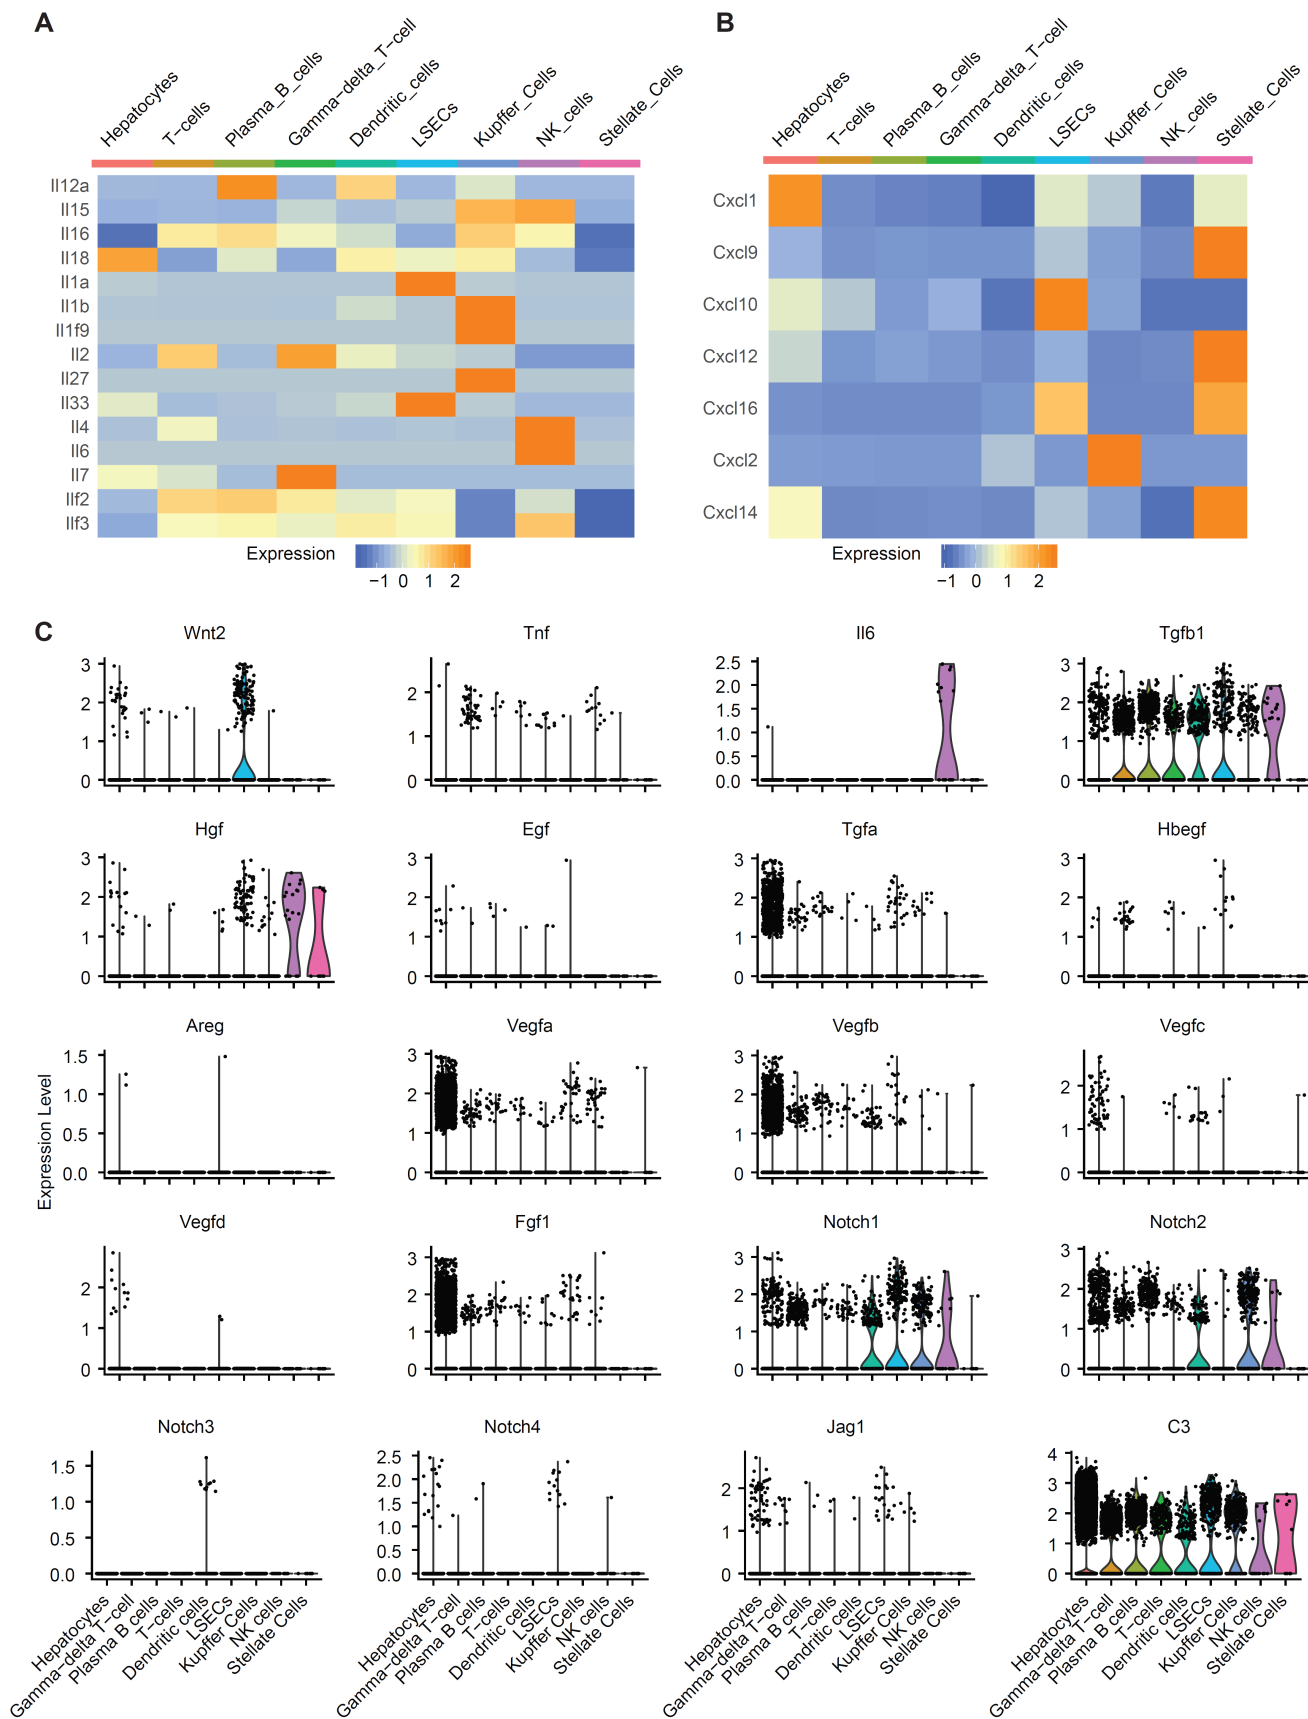

**Figure 5—figure supplement 1.** Heatmap demonstrating cell-type-specific expression patterns of (A) Interleukins and (B) Chemokines identified in our dataset. (C) Violin Plots showing cell-type-specific expression patterns of different mitogens identified in our dataset.

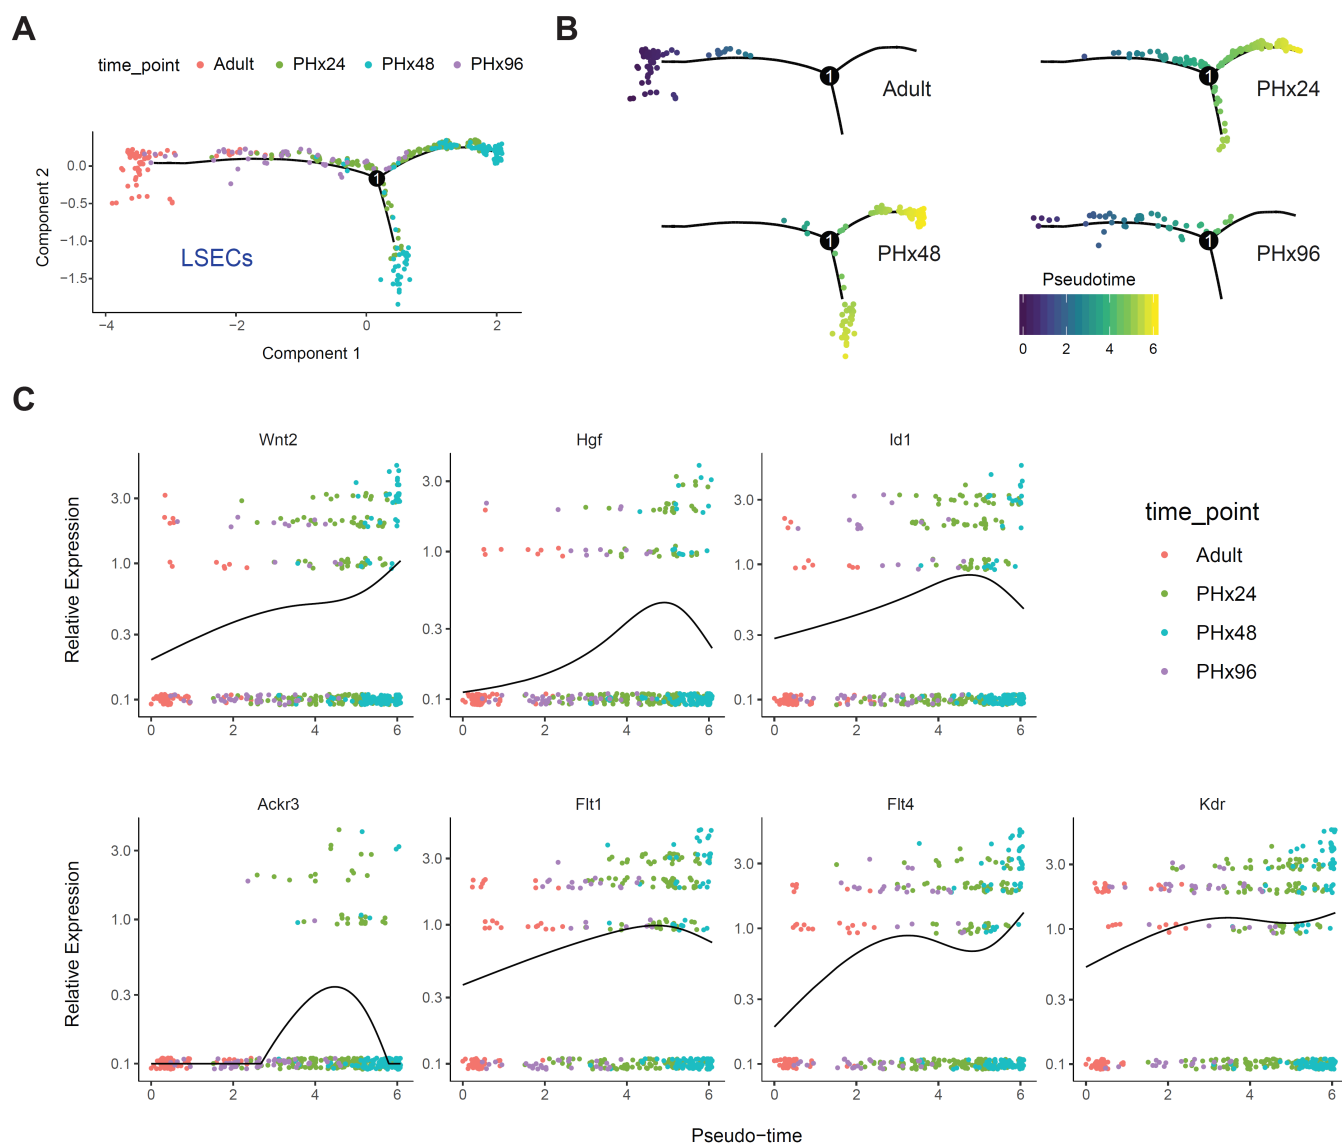

**Figure 5—figure supplement 2. (A)** LSEC activation during regeneration. Single cell trajectories were constructed and pseudotime values were calculated using Monocle 2, with LSECs identified from adult, PHx24, PHx48 and PHx96 samples. Cells within trajectories are colored by sample identity. **(B)** Distribution of LSECs from different time points along the activation trajectory. Cells are colored by pseudotime value. **(C)** Variation in relative expression levels of LSEC activation-associated genes along the pseudotime trajectory. X- and Y-axis corresponds to pseudo-time value of each cell and relative expression level of the gene under evaluation respectively.

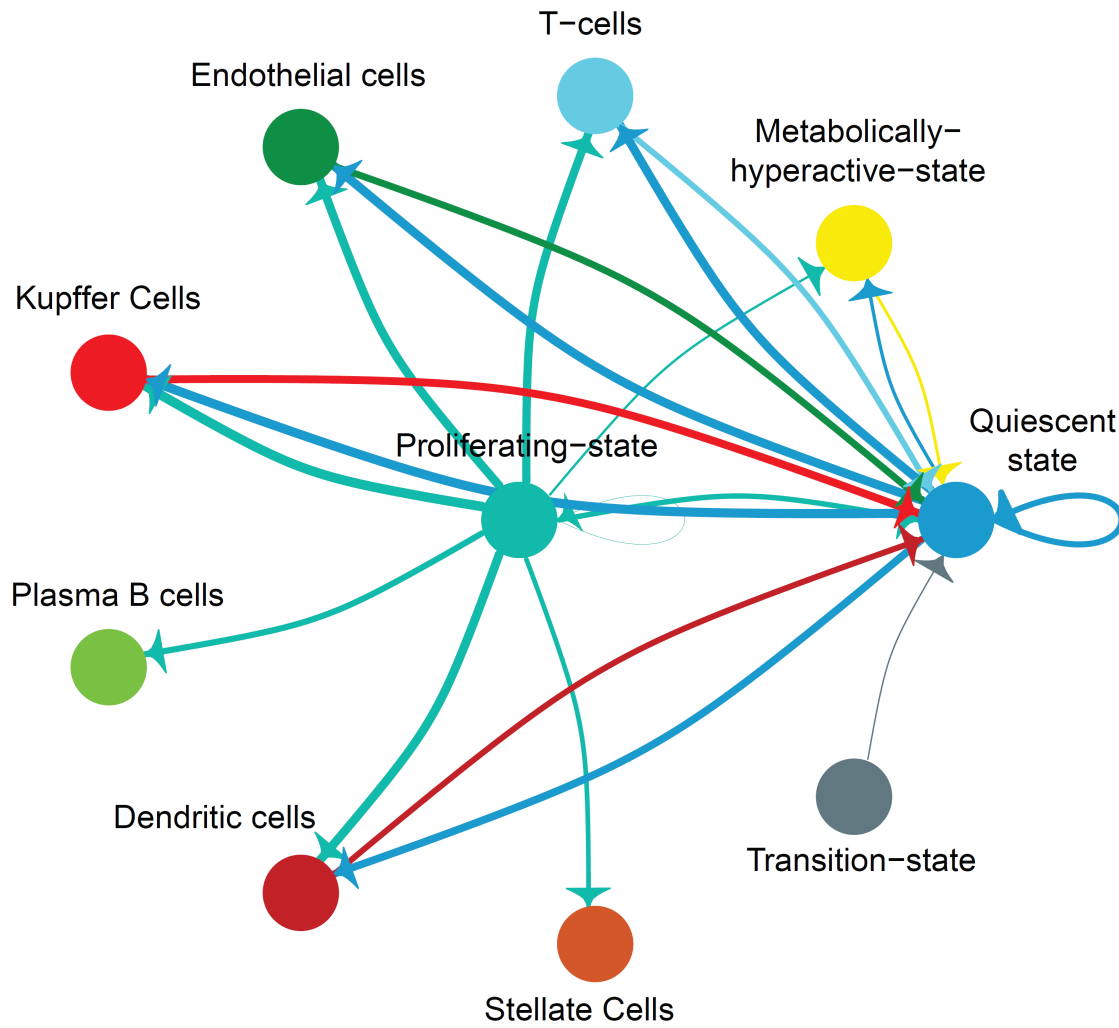

**Figure 5—figure supplement 3.** Network diagram showing significant cell-cell interactions for P14, where interactions are indicated by arrows(edges) pointing in the source to target direction. Thickness indicates the sum of weighted paths between populations and color of arrows corresponds to the source

## 784 REFERENCES

785

786 Achanta, S., Verma, A., Srivastava, A., Nilakantan, H., Hoek, J.B., and Vadigepalli, R. (2019).  
787 Single-Cell Gene Expression Analysis Identifies Chronic Alcohol-Mediated Shift in Hepatocyte  
788 Molecular States After Partial Hepatectomy. *Gene Expr.* *19*, 97–119.

789 Aibar, S., González-Blas, C.B., Moerman, T., Huynh-Thu, V.A., Imrichova, H., Hulselmans, G.,  
790 Rambow, F., Marine, J.-C., Geurts, P., Aerts, J., et al. (2017). SCENIC: single-cell regulatory  
791 network inference and clustering. *Nat. Methods* *14*, 1083–1086.

792 Aizarani, N., Saviano, A., Sagar, Mailly, L., Durand, S., Herman, J.S., Pessaux, P., Baumert,  
793 T.F., and Grün, D. (2019). A human liver cell atlas reveals heterogeneity and epithelial  
794 progenitors. *Nature* *572*, 199–204.

795 Aloia, L., McKie, M.A., Vernaz, G., Cordero-Espinoza, L., Aleksieva, N., van den Aamele, J.,  
796 Antonica, F., Font-Cunill, B., Raven, A., Aiese Cigliano, R., et al. (2019). Epigenetic  
797 remodelling licences adult cholangiocytes for organoid formation and liver regeneration. *Nat.*  
798 *Cell Biol.* *21*, 1321–1333.

799 Ankoma-Sey, V., Matli, M., Chang, K.B., Lalazar, A., Donner, D.B., Wong, L., Warren, R.S.,  
800 and Friedman, S.L. (1998). Coordinated induction of VEGF receptors in mesenchymal cell  
801 types during rat hepatic wound healing. *Oncogene* *17*, 115–121.

802 Asrani, S.K., Devarbhavi, H., Eaton, J., and Kamath, P.S. (2019). Burden of liver diseases in  
803 the world. *J. Hepatol.* *70*, 151–171.

804 Baena, E., Gandarillas, A., Vallespinós, M., Zanet, J., Bachs, O., Redondo, C., Fabregat, I.,  
805 Martínez-A, C., and de Alborán, I.M. (2005). c-Myc regulates cell size and ploidy but is not  
806 essential for postnatal proliferation in liver. *Proc. Natl. Acad. Sci. U.S.a.* *102*, 7286–7291.

807 Bangru, S., and Kalsotra, A. (2020). Cellular and molecular basis of liver regeneration. *Semin.*  
808 *Cell Dev. Biol.* *100*, 74-87.

809 Bangru, S., Arif, W., Seimetz, J., Bhate, A., Chen, J., Rshan, E.H., Carstens, R.P., Anakk, S.,  
810 and Kalsotra, A. (2018). Alternative splicing rewires Hippo signaling pathway in hepatocytes to  
811 promote liver regeneration. *Nat. Struct. Mol. Biol.* *25*, 928–939.

812 Beyer, T.A., Xu, W., Teupser, D., auf dem Keller, U., Bugnon, P., Hildt, E., Thiery, J., Kan,  
813 Y.W., and Werner, S. (2008). Impaired liver regeneration in Nrf2 knockout mice: role of ROS-  
814 mediated insulin/IGF-1 resistance. *Embo J.* *27*, 212–223.

815 Bhat, N.K., Fisher, R.J., Fujiwara, S., Ascione, R., and Papas, T.S. (1987). Temporal and  
816 tissue-specific expression of mouse ets genes. *Proc. Natl. Acad. Sci. U.S.a.* *84*, 3161–3165.

817 Bhate, A., Parker, D.J., Bebee, T.W., Ahn, J., Arif, W., Rshan, E.H., Chorghade, S., Chau, A.,  
818 Lee, J., Anakk, S., Carstens, R.P., Xiao, X., Kalsotra, A. (2015). ESRP2 controls an adult splicing  
819 programme in hepatocytes to support postnatal liver maturation. *Nature Communications* *6*, 8768.

820 Bissell, D.M., Wang, S.S., Jarnagin, W.R., and Roll, F.J. (1995). Cell-specific expression of  
821 transforming growth factor-beta in rat liver. Evidence for autocrine regulation of hepatocyte  
822 proliferation. *Journal of Clinical Investigation* *96*, 447–455.



- 823 Bonzo, J.A., Ferry, C.H., Matsubara, T., Kim, J.-H., and Gonzalez, F.J. (2012). Suppression of  
824 hepatocyte proliferation by hepatocyte nuclear factor 4 $\alpha$  in adult mice. *J. Biol. Chem.* *287*,  
825 7345–7356.
- 826 Boyce, S., and Harrison, D. (2008). A detailed methodology of partial hepatectomy in the  
827 mouse. *Lab Anim (NY)* *37*, 529–532.
- 828 Braun, L., Mead, J.E., Panzica, M., Mikumo, R., Bell, G.I., and Fausto, N. (1988). Transforming  
829 growth factor beta mRNA increases during liver regeneration: a possible paracrine mechanism  
830 of growth regulation. *Proc. Natl. Acad. Sci. U.S.a.* *85*, 1539–1543.
- 831 Butler, A., Hoffman, P., Smibert, P., Papalexi, E., and Satija, R. (2018). Integrating single-cell  
832 transcriptomic data across different conditions, technologies, and species. *Nat. Biotechnol.* *36*,  
833 411–420.
- 834 Caldez, M.J., Van Hul, N., Koh, H.W.L., Teo, X.Q., Fan, J.J., Tan, P.Y., Dewhurst, M.R., Too,  
835 P.G., Talib, S.Z.A., Chiang, B.E., et al. (2018). Metabolic Remodeling during Liver  
836 Regeneration. *Dev. Cell* *47*, 425–438.e425.
- 837 Carr, B.I., Huang, T.H., Itakura, K., Noël, M., and Marceau, N. (1989). TGF beta gene  
838 transcription in normal and neoplastic liver growth. *J. Cell. Biochem.* *39*, 477–487.
- 839 Chaisson, M.L., Brooling, J.T., Ladiges, W., Tsai, S., and Fausto, N. (2002). Hepatocyte-  
840 specific inhibition of NF-kappaB leads to apoptosis after TNF treatment, but not after partial  
841 hepatectomy. *Journal of Clinical Investigation* *110*, 193–202.
- 842 Chen, F., Jimenez, R.J., Sharma, K., Luu, H.Y., Hsu, B.Y., Ravindranathan, A., Stohr, B.A.,  
843 and Willenbring, H. (2020). Broad Distribution of Hepatocyte Proliferation in Liver Homeostasis  
844 and Regeneration. *Cell Stem Cell* *26*, 27–33.e4.
- 845 Colak, D., Al-Harazi, O., Mustafa, O.M., Meng, F., Assiri, A.M., Dhar, D.K., and Broering, D.C.  
846 (2020). RNA-Seq transcriptome profiling in three liver regeneration models in rats: comparative  
847 analysis of partial hepatectomy, ALLPS, and PVL. *Sci Rep* *10*, 5213–5215.
- 848 Cook, D., Achanta, S., Hoek, J.B., Ogunnaike, B.A., and Vadigepalli, R. (2018). Cellular  
849 network modeling and single cell gene expression analysis reveals novel hepatic stellate cell  
850 phenotypes controlling liver regeneration dynamics. *BMC Syst Biol* *12*, 86–29.
- 851 Cordero-Espinoza, L., and Huch, M. (2018). The balancing act of the liver: tissue regeneration  
852 versus fibrosis. *J. Clin. Invest.* *128*, 85–96.
- 853 DeAngelis, R.A., Markiewski, M.M., Kourtzelis, I., Rafail, S., Syriga, M., Sandor, A., Maurya,  
854 M.R., Gupta, S., Subramaniam, S., and Lambris, J.D. (2012). A complement-IL-4 regulatory  
855 circuit controls liver regeneration. *J. Immunol.* *188*, 641–648.
- 856 Dennis, G., Sherman, B.T., Hosack, D.A., Yang, J., Gao, W., Lane, H.C., and Lempicki, R.A.  
857 (2003). DAVID: Database for Annotation, Visualization, and Integrated Discovery. *Genome*  
858 *Biol.* *4*, P3.
- 859 Diehl, A.M., and Chute, J. (2013). Underlying potential: cellular and molecular determinants of  
860 adult liver repair. *J. Clin. Invest.* *123*, 1858–1860.

- 861 Ding, B.-S., Nolan, D.J., Butler, J.M., James, D., Babazadeh, A.O., Rosenwaks, Z., Mittal, V.,  
862 Kobayashi, H., Shido, K., Lyden, D., et al. (2010). Inductive angiocrine signals from sinusoidal  
863 endothelium are required for liver regeneration. *Nature* 468, 310–315.
- 864 Dobie, R., Wilson-Kanamori, J.R., Henderson, B.E.P., Smith, J.R., Matchett, K.P., Portman,  
865 J.R., Wallenborg, K., Picelli, S., Zagorska, A., Pendem, S.V., et al. (2019). Single-Cell  
866 Transcriptomics Uncovers Zonation of Function in the Mesenchyme during Liver Fibrosis. *Cell*  
867 *Rep* 29, 1832–1847.e1838.
- 868 Farbehi, N., Patrick, R., Dorison, A., Xaymardan, M., Janbandhu, V., Wystub-Lis, K., Ho, J.W.,  
869 Nordon, R.E., and Harvey, R.P. (2019). Single-cell expression profiling reveals dynamic flux of  
870 cardiac stromal, vascular and immune cells in health and injury. *Elife* 8, 1241.
- 871 Fausto, N., Campbell, J.S., and Riehle, K.J. (2006). Liver regeneration. *Hepatology* 43, S45–  
872 S53.
- 873 Font-Burgada, J., Shalapour, S., Ramaswamy, S., Hsueh, B., Rossell, D., Umemura, A.,  
874 Taniguchi, K., Nakagawa, H., Valasek, M.A., Ye, L., et al. (2015). Hybrid Periportal  
875 Hepatocytes Regenerate the Injured Liver without Giving Rise to Cancer. *Cell* 162, 766–779.
- 876 Forbes, S.J., and Newsome, P.N. (2016). Liver regeneration - mechanisms and models to  
877 clinical application. *Nat Rev Gastroenterol Hepatol* 13, 473–485.
- 878 Furge, K.A., Zhang, Y.W., and Vande Woude, G.F. (2000). Met receptor tyrosine kinase:  
879 enhanced signaling through adapter proteins. *Oncogene* 19, 5582–5589.
- 880 Greenbaum, L.E., Cressman, D.E., Haber, B.A., and Taub, R. (1995). Coexistence of C/EBP  
881 alpha, beta, growth-induced proteins and DNA synthesis in hepatocytes during liver  
882 regeneration. Implications for maintenance of the differentiated state during liver growth.  
883 *Journal of Clinical Investigation* 96, 1351–1365.
- 884 Greenbaum, L.E., Li, W., Cressman, D.E., Peng, Y., Ciliberto, G., Poli, V., and Taub, R.  
885 (1998). CCAAT enhancer-binding protein beta is required for normal hepatocyte proliferation  
886 in mice after partial hepatectomy. *Journal of Clinical Investigation* 102, 996–1007.
- 887 Haghverdi, L., Büttner, M., Wolf, F.A., Buettner, F., and Theis, F.J. (2016). Diffusion  
888 pseudotime robustly reconstructs lineage branching. *Nat. Methods* 13, 845–848.
- 889 Halpern, K.B., Shenhav, R., Massalha, H., Toth, B., Egozi, A., Massasa, E.E., Medgalia, C.,  
890 David, E., Giladi, A., Moor, A.E., et al. (2018). Paired-cell sequencing enables spatial gene  
891 expression mapping of liver endothelial cells. *Nat. Biotechnol.* 36, 962–970.
- 892 Halpern, K.B., Shenhav, R., Matcovitch-Natan, O., Toth, B., Lemze, D., Golan, M., Massasa,  
893 E.E., Baydatch, S., Landen, S., Moor, A.E., et al. (2017). Single-cell spatial reconstruction  
894 reveals global division of labour in the mammalian liver. *Nature* 542, 352–356.
- 895 Hatziapostolou, M., Polytaichou, C., Aggelidou, E., Drakaki, A., Poultsides, G.A., Jaeger, S.A.,  
896 Ogata, H., Karin, M., Struhl, K., Hadzopoulou-Cladaras, M., et al. (2011). An HNF4 $\alpha$ -miRNA  
897 inflammatory feedback circuit regulates hepatocellular oncogenesis. *Cell* 147, 1233–1247.
- 898 Hayhurst, G.P., Lee, Y.H., Lambert, G., Ward, J.M., and Gonzalez, F.J. (2001). Hepatocyte

- 899 nuclear factor 4alpha (nuclear receptor 2A1) is essential for maintenance of hepatic gene  
900 expression and lipid homeostasis. *Mol. Cell. Biol.* *21*, 1393–1403.
- 901 Huang, J., and Rudnick, D.A. (2014). Elucidating the metabolic regulation of liver regeneration.  
902 *Am. J. Pathol.* *184*, 309–321.
- 903 Huch, M., Dorrell, C., Boj, S.F., van Es, J.H., Li, V.S.W., van de Wetering, M., Sato, T., Hamer,  
904 K., Sasaki, N., Finegold, M.J., et al. (2013). In vitro expansion of single Lgr5+ liver stem cells  
905 induced by Wnt-driven regeneration. *Nature* *494*, 247–250.
- 906 Huck, I., Gunewardena, S., Español-Suñer, R., Willenbring, H., and Apte, U. (2019).  
907 Hepatocyte Nuclear Factor 4 Alpha Activation Is Essential for Termination of Liver  
908 Regeneration in Mice. *Hepatology* *70*, 666–681.
- 909 Hyun, J., Oh, S.-H., Premont, R.T., Guy, C.D., Berg, C.L., and Diehl, A.M. (2019).  
910 Dysregulated activation of fetal liver programme in acute liver failure. *Gut* *68*, 1076–1087.
- 911 Hyun, J., Sun, Z., Ahmadi, A.R., Bangru, S., Chembazhi, U.V., Du, K., Chen, T., Tsukamoto,  
912 H., Rusyn, I., Kalsotra, A., Diehl, A.M. (2020). Epithelial splicing regulatory protein 2-mediated  
913 alternative splicing reprograms hepatocytes in severe alcoholic hepatitis. *J. Clin. Invest.* *6*, 232.
- 914 Imuro, Y., Nishiura, T., Hellerbrand, C., Behrens, K.E., Schoonhoven, R., Grisham, J.W., and  
915 Brenner, D.A. (1998). NFkappaB prevents apoptosis and liver dysfunction during liver  
916 regeneration. *Journal of Clinical Investigation* *101*, 802–811.
- 917 Ilicic, T., Kim, J.K., Kolodziejczyk, A.A., Bagger, F.O., McCarthy, D.J., Marioni, J.C., and  
918 Teichmann, S.A. (2016). Classification of low quality cells from single-cell RNA-seq data.  
919 *Genome Biol.* *17*, 29–15.
- 920 Inoue, Y., Tomiya, T., Yanase, M., Arai, M., Ikeda, H., Tejima, K., Ogata, I., Kimura, S., Omata,  
921 M., and Fujiwara, K. (2002a). p53 May positively regulate hepatocyte proliferation in rats.  
922 *Hepatology* *36*, 336–344.
- 923 Inoue, Y., Hayhurst, G.P., Inoue, J., Mori, M., and Gonzalez, F.J. (2002b). Defective  
924 ureagenesis in mice carrying a liver-specific disruption of hepatocyte nuclear factor 4alpha  
925 (HNF4alpha ). HNF4alpha regulates ornithine transcarbamylase in vivo. *J. Biol. Chem.* *277*,  
926 25257–25265.
- 927 Inoue, Y., Peters, L.L., Yim, S.H., Inoue, J., and Gonzalez, F.J. (2006a). Role of hepatocyte  
928 nuclear factor 4alpha in control of blood coagulation factor gene expression. *J. Mol. Med.* *84*,  
929 334–344.
- 930 Inoue, Y., Yu, A.-M., Inoue, J., and Gonzalez, F.J. (2004). Hepatocyte nuclear factor 4alpha is  
931 a central regulator of bile acid conjugation. *J. Biol. Chem.* *279*, 2480–2489.
- 932 Inoue, Y., Yu, A.-M., Yim, S.H., Ma, X., Krausz, K.W., Inoue, J., Xiang, C.C., Brownstein, M.J.,  
933 Eggertsen, G., Björkhem, I., et al. (2006b). Regulation of bile acid biosynthesis by hepatocyte  
934 nuclear factor 4alpha. *J. Lipid Res.* *47*, 215–227.
- 935 Jakobsen, J.S., Waage, J., Rapin, N., Bisgaard, H.C., Larsen, F.S., and Porse, B.T. (2013).  
936 Temporal mapping of CEBPA and CEBPB binding during liver regeneration reveals dynamic

- 937 occupancy and specific regulatory codes for homeostatic and cell cycle gene batteries.  
938 *Genome Res.* 23, 592–603.
- 939 Jin, J., Hong, I.-H., Lewis, K., Iakova, P., Breaux, M., Jiang, Y., Sullivan, E., Jawanmardi, N.,  
940 Timchenko, L., and Timchenko, N.A. (2015). Cooperation of C/EBP family proteins and  
941 chromatin remodeling proteins is essential for termination of liver regeneration. *Hepatology* 61,  
942 315–325.
- 943 Kelley-Loughnane, N., Sabla, G.E., Ley-Ebert, C., Aronow, B.J., and Bezerra, J.A. (2002).  
944 Independent and overlapping transcriptional activation during liver development and  
945 regeneration in mice. *Hepatology* 35, 525–534.
- 946 Kharchenko, P.V., Silberstein, L., and Scadden, D.T. (2014). Bayesian approach to single-cell  
947 differential expression analysis. *Nat. Methods* 11, 740–742.
- 948 Kiso, S., Kawata, S., Tamura, S., Higashiyama, S., Ito, N., Tsushima, H., Taniguchi, N., and  
949 Matsuzawa, Y. (1995). Role of heparin-binding epidermal growth factor-like growth factor as a  
950 hepatotrophic factor in rat liver regeneration after partial hepatectomy. *Hepatology* 22, 1584–  
951 1590.
- 952 Kiso, S., Kawata, S., Tamura, S., Inui, Y., Yoshida, Y., Sawai, Y., Umeki, S., Ito, N., Yamada,  
953 A., Miyagawa, J.-I., et al. (2003). Liver regeneration in heparin-binding EGF-like growth factor  
954 transgenic mice after partial hepatectomy. *Gastroenterology* 124, 701–707.
- 955 Kurinna, S., Stratton, S.A., Coban, Z., Schumacher, J.M., Grompe, M., Duncan, A.W., and  
956 Barton, M.C. (2013). p53 regulates a mitotic transcription program and determines ploidy in  
957 normal mouse liver. *Hepatology* 57, 2004–2013.
- 958 Kuttippurathu, L., Patra, B., Cook, D., Hoek, J.B., and Vadigepalli, R. (2017). Pattern analysis  
959 uncovers a chronic ethanol-induced disruption of the switch-like dynamics of C/EBP- $\beta$  and  
960 C/EBP- $\alpha$  genome-wide binding during liver regeneration. *Physiol. Genomics* 49, 11–26.
- 961 Kyrmizi, I., Hatzis, P., Katrakili, N., Tronche, F., Gonzalez, F.J., and Talianidis, I. (2006).  
962 Plasticity and expanding complexity of the hepatic transcription factor network during liver  
963 development. *Genes Dev.* 20, 2293–2305.
- 964 LeCouter, J., Moritz, D.R., Li, B., Phillips, G.L., Liang, X.H., Gerber, H.-P., Hillan, K.J., and  
965 Ferrara, N. (2003). Angiogenesis-independent endothelial protection of liver: role of VEGFR-1.  
966 *Science* 299, 890–893.
- 967 Li, W.-C., Ralphs, K.L., and Tosh, D. (2010). Isolation and culture of adult mouse hepatocytes.  
968 *Methods Mol. Biol.* 633, 185–196.
- 969 Lin, S., Nascimento, E.M., Gajera, C.R., Chen, L., Neuhöfer, P., Garbuzov, A., Wang, S., and  
970 Artandi, S.E. (2018). Distributed hepatocytes expressing telomerase repopulate the liver in  
971 homeostasis and injury. *Nature* 556, 244–248.
- 972 Liu, Y., Lui, E.L.H., Friedman, S.L., Li, L., Ye, T., Chen, Y., Poon, R.T., Wo, J., Kok, T.W., and  
973 Fan, S.T. (2009). PTK787/ZK22258 attenuates stellate cell activation and hepatic fibrosis in  
974 vivo by inhibiting VEGF signaling. *Lab. Invest.* 89, 209–221.

- 975 Locasale, J.W., and Cantley, L.C. (2011). Metabolic flux and the regulation of mammalian cell  
976 growth. *Cell Metab.* *14*, 443–451.
- 977 Louvet, A., and Mathurin, P. (2015). Alcoholic liver disease: mechanisms of injury and targeted  
978 treatment. *Nat Rev Gastroenterol Hepatol* *12*, 231–242.
- 979 Lu, W.-Y., Bird, T.G., Boulter, L., Tsuchiya, A., Cole, A.M., Hay, T., Guest, R.V., Wojtacha, D.,  
980 Man, T.Y., Mackinnon, A., et al. (2015). Hepatic progenitor cells of biliary origin with liver  
981 repopulation capacity. *Nat. Cell Biol.* *17*, 971–983.
- 982 MacParland, S.A., Liu, J.C., Ma, X.-Z., Innes, B.T., Bartczak, A.M., Gage, B.K., Manuel, J.,  
983 Khuu, N., Echeverri, J., Linares, I., et al. (2018). Single cell RNA sequencing of human liver  
984 reveals distinct intrahepatic macrophage populations. *Nature Communications* *9*, 4383–21.
- 985 Maher, J.J. (1993). Cell-specific expression of hepatocyte growth factor in liver. Upregulation in  
986 sinusoidal endothelial cells after carbon tetrachloride. *Journal of Clinical Investigation* *91*,  
987 2244–2252.
- 988 Marcellin, P., and Kutala, B.K. (2018). Liver diseases: A major, neglected global public health  
989 problem requiring urgent actions and large-scale screening. *Liver Int.* *38 Suppl 1*, 2–6.
- 990 Matsumoto, T., Wakefield, L., Tarlow, B.D., and Grompe, M. (2020). In Vivo Lineage Tracing of  
991 Polyploid Hepatocytes Reveals Extensive Proliferation during Liver Regeneration. *Cell Stem*  
992 *Cell* *26*, 34–47.e3.
- 993 Mead, J.E., and Fausto, N. (1989). Transforming growth factor alpha may be a physiological  
994 regulator of liver regeneration by means of an autocrine mechanism. *Proc. Natl. Acad. Sci.*  
995 *U.S.a.* *86*, 1558–1562.
- 996 Michalopoulos, G.K., and DeFrances, M.C. (1997). Liver regeneration. *Science* *276*, 60–66.
- 997 Michalopoulos, G.K. (2007). Liver regeneration. *J. Cell. Physiol.* *213*, 286–300.
- 998 Michalopoulos, G.K. (2017). Hepatostat: Liver regeneration and normal liver tissue  
999 maintenance. *Hepatology* *65*, 1384–1392.
- 1000 Michalopoulos, G.K., and Khan, Z. (2015). Liver Stem Cells: Experimental Findings and  
1001 Implications for Human Liver Disease. *Gastroenterology* *149*, 876–882.
- 1002 Minocha, S., Villeneuve, D., Rib, L., Moret, C., Guex, N., and Herr, W. (2017). Segregated  
1003 hepatocyte proliferation and metabolic states within the regenerating mouse liver. *Hepatol*  
1004 *Commun* *1*, 871–885.
- 1005 Mitchell, C., and Willenbring, H. (2008). A reproducible and well-tolerated method for 2/3  
1006 partial hepatectomy in mice. *Nat Protoc* *3*, 1167–1170.
- 1007 Miyajima, A., Tanaka, M., and Itoh, T. (2014). Stem/progenitor cells in liver development,  
1008 homeostasis, regeneration, and reprogramming. *Cell Stem Cell* *14*, 561–574.
- 1009 Miyaoka, Y., Ebato, K., Kato, H., Arakawa, S., Shimizu, S., and Miyajima, A. (2012).  
1010 Hypertrophy and unconventional cell division of hepatocytes underlie liver regeneration. *Curr.*



- 1011 Biol. 22, 1166–1175.
- 1012 Nakatsukasa, H., Evarts, R.P., Hsia, C.C., and Thorgeirsson, S.S. (1990). Transforming  
1013 growth factor-beta 1 and type I procollagen transcripts during regeneration and early fibrosis of  
1014 rat liver. *Laboratory Investigation* 63, 171–180.
- 1015 Nishikawa, T., Bell, A., Brooks, J.M., Setoyama, K., Melis, M., Han, B., Fukumitsu, K., Handa,  
1016 K., Tian, J., Kaestner, K.H., et al. (2015). Resetting the transcription factor network reverses  
1017 terminal chronic hepatic failure. *J. Clin. Invest.* 125, 1533–1544.
- 1018 Olsen, P.S., Poulsen, S.S., and Kirkegaard, P. (1985). Adrenergic effects on secretion of  
1019 epidermal growth factor from Brunner's glands. *Gut* 26, 920–927.
- 1020 Osada, S., Yamamoto, H., Nishihara, T., and Imagawa, M. (1996). DNA binding specificity of  
1021 the CCAAT/enhancer-binding protein transcription factor family. *J. Biol. Chem.* 271, 3891–  
1022 3896.
- 1023 Parviz, F., Matullo, C., Garrison, W.D., Savatski, L., Adamson, J.W., Ning, G., Kaestner, K.H.,  
1024 Rossi, J.M., Zaret, K.S., and Duncan, S.A. (2003). Hepatocyte nuclear factor 4alpha controls  
1025 the development of a hepatic epithelium and liver morphogenesis. *Nat. Genet.* 34, 292–296.
- 1026 Pepe-Mooney, B.J., Dill, M.T., Alemany, A., Ordovas-Montanes, J., Matsushita, Y., Rao, A.,  
1027 Sen, A., Miyazaki, M., Anakk, S., Dawson, P.A., et al. (2019). Single-Cell Analysis of the Liver  
1028 Epithelium Reveals Dynamic Heterogeneity and an Essential Role for YAP in Homeostasis  
1029 and Regeneration. *Cell Stem Cell* 25, 23–38.e28.
- 1030 Preziosi, M., Okabe, H., Poddar, M., Singh, S., and Monga, S.P. (2018). Endothelial Wnts  
1031 regulate  $\beta$ -catenin signaling in murine liver zonation and regeneration: A sequel to the Wnt-  
1032 Wnt situation. *Hepatol Commun* 2, 845–860.
- 1033 Pu, W., Zhang, H., Huang, X., Tian, X., He, L., Wang, Y., Zhang, L., Liu, Q., Li, Y., Li, Y., et al.  
1034 (2016). Mfsd2a<sup>+</sup> hepatocytes repopulate the liver during injury and regeneration. *Nature*  
1035 *Communications* 7, 13369.
- 1036 Qiu, X., Hill, A., Packer, J., Lin, D., Ma, Y.-A., and Trapnell, C. (2017a). Single-cell mRNA  
1037 quantification and differential analysis with Census. *Nat. Methods* 14, 309–315.
- 1038 Qiu, X., Mao, Q., Tang, Y., Wang, L., Chawla, R., Pliner, H.A., and Trapnell, C. (2017b).  
1039 Reversed graph embedding resolves complex single-cell trajectories. *Nat. Methods* 14, 979–  
1040 982.
- 1041 Ramachandran, P., Dobie, R., Wilson-Kanamori, J.R., Dora, E.F., Henderson, B.E.P., Luu,  
1042 N.T., Portman, J.R., Matchett, K.P., Brice, M., Marwick, J.A., et al. (2019). Resolving the  
1043 fibrotic niche of human liver cirrhosis at single-cell level. *Nature* 575, 512–518.
- 1044 Raredon, M.S.B., Adams, T.S., Suhail, Y., Schupp, J.C., Poli, S., Neumark, N., Leiby, K.L.,  
1045 Greaney, A.M., Yuan, Y., Horien, C., et al. (2019). Single-cell connectomic analysis of adult  
1046 mammalian lungs. *Sci Adv* 5, eaaw3851.
- 1047 Raven, A., Lu, W.-Y., Man, T.Y., Ferreira-Gonzalez, S., O'Duibhir, E., Dwyer, B.J., Thomson,  
1048 J.P., Meehan, R.R., Bogorad, R., Koteliansky, V., et al. (2017). Cholangiocytes act as

- 1049 facultative liver stem cells during impaired hepatocyte regeneration. *Nature* 547, 350–354.
- 1050 Reddy, C.C., Wells, A., and Lauffenburger, D.A. (1996). Receptor-mediated effects on ligand  
1051 availability influence relative mitogenic potencies of epidermal growth factor and transforming  
1052 growth factor alpha. *J. Cell. Physiol.* 166, 512–522.
- 1053 Richardson, M.M., Jonsson, J.R., Powell, E.E., Brunt, E.M., Neuschwander-Tetri, B.A.,  
1054 Bhathal, P.S., Dixon, J.B., Weltman, M.D., Tilg, H., Moschen, A.R., et al. (2007). Progressive  
1055 fibrosis in nonalcoholic steatohepatitis: association with altered regeneration and a ductular  
1056 reaction. *Gastroenterology* 133, 80–90.
- 1057 Russell, J.O., and Monga, S.P. (2018). Wnt/ $\beta$ -Catenin Signaling in Liver Development,  
1058 Homeostasis, and Pathobiology. *Annu Rev Pathol* 13, 351–378.
- 1059 Rychtrmoc, D., Hubálková, L., Višková, A., Libra, A., Bunček, M., and Červinková, Z. (2012).  
1060 Transcriptome temporal and functional analysis of liver regeneration termination. *Physiol Res*  
1061 61 Suppl 2, S77–S92.
- 1062 Saelens, W., Cannoodt, R., Todorov, H., and Saeys, Y. (2019). A comparison of single-cell  
1063 trajectory inference methods. *Nat. Biotechnol.* 37, 547–554.
- 1064 Sato, Y., Katoh, Y., Matsumoto, M., Sato, M., Ebina, M., Itoh-Nakadai, A., Funayama, R.,  
1065 Nakayama, K., Unno, M., and Igarashi, K. (2017). Regulatory signatures of liver regeneration  
1066 distilled by integrative analysis of mRNA, histone methylation, and proteomics. *J. Biol. Chem.*  
1067 292, 8019–8037.
- 1068 Schaub, J.R., Malato, Y., Gormond, C., and Willenbring, H. (2014). Evidence against a stem  
1069 cell origin of new hepatocytes in a common mouse model of chronic liver injury. *Cell Rep* 8,  
1070 933–939.
- 1071 Schiebinger, G., Shu, J., Tabaka, M., Cleary, B., Subramanian, V., Solomon, A., Gould, J., Liu,  
1072 S., Lin, S., Berube, P., et al. (2019). Optimal-Transport Analysis of Single-Cell Gene  
1073 Expression Identifies Developmental Trajectories in Reprogramming. *Cell* 176, 1517.
- 1074 Schirmacher, P., Geerts, A., Pietrangelo, A., Dienes, H.P., and Rogler, C.E. (1992).  
1075 Hepatocyte growth factor/hepatopoietin A is expressed in fat-storing cells from rat liver but not  
1076 myofibroblast-like cells derived from fat-storing cells. *Hepatology* 15, 5–11.
- 1077 Schrem, H., Klempnauer, J., and Borlak, J. (2002). Liver-enriched transcription factors in liver  
1078 function and development. Part I: the hepatocyte nuclear factor network and liver-specific gene  
1079 expression. *Pharmacol. Rev.* 54, 129–158.
- 1080 Seitz, H.K., Bataller, R., Cortez-Pinto, H., Gao, B., Gual, A., Lackner, C., Mathurin, P., Mueller,  
1081 S., Szabo, G., and Tsukamoto, H. (2018). Alcoholic liver disease. *Nat Rev Dis Primers* 4, 16–  
1082 22.
- 1083 Servillo, G., Fazia, Della, M.A., and Sassone-Corsi, P. (1998). Transcription factor CREM  
1084 coordinates the timing of hepatocyte proliferation in the regenerating liver. *Genes Dev.* 12,  
1085 3639–3643.
- 1086 Sladky, V.C., Knapp, K., Soratroi, C., Heppke, J., Eichin, F., Rocamora-Reverte, L., Szabo,



- 1087 T.G., Bongiovanni, L., Westendorp, B., Moreno, E., et al. (2020). E2F-Family Members  
1088 Engage the PIDDosome to Limit Hepatocyte Ploidy in Liver Development and Regeneration.  
1089 *Dev. Cell* 52, 335–349.e337.
- 1090 Smith, J.R., Hayman, G.T., Wang, S.-J., Lauderkind, S.J.F., Hoffman, M.J., Kaldunski, M.L.,  
1091 Tutaj, M., Thota, J., Nalabolu, H.S., Ellanki, S.L.R., et al. (2020). The Year of the Rat: The Rat  
1092 Genome Database at 20: a multi-species knowledgebase and analysis platform. *Nucleic Acids*  
1093 *Res.* 48, D731–D742.
- 1094 St Hilaire, R.J., and Jones, A.L. (1982). Epidermal growth factor: its biologic and metabolic  
1095 effects with emphasis on the hepatocyte. *Hepatology* 2, 601–613.
- 1096 St Hilaire, R.J., Hradek, G.T., and Jones, A.L. (1983). Hepatic sequestration and biliary  
1097 secretion of epidermal growth factor: evidence for a high-capacity uptake system. *Proc. Natl.*  
1098 *Acad. Sci. U.S.a.* 80, 3797–3801.
- 1099 Stepniak, E., Ricci, R., Eferl, R., Sumara, G., Sumara, I., Rath, M., Hui, L., and Wagner, E.F.  
1100 (2006). c-Jun/AP-1 controls liver regeneration by repressing p53/p21 and p38 MAPK activity.  
1101 *Genes Dev.* 20, 2306–2314.
- 1102 Strey, C.W., Markiewski, M., Mastellos, D., Tudoran, R., Spruce, L.A., Greenbaum, L.E., and  
1103 Lambris, J.D. (2003). The proinflammatory mediators C3a and C5a are essential for liver  
1104 regeneration. *J. Exp. Med.* 198, 913–923.
- 1105 Su, A.I., Guidotti, L.G., Pezacki, J.P., Chisari, F.V., and Schultz, P.G. (2002). Gene expression  
1106 during the priming phase of liver regeneration after partial hepatectomy in mice. *Proc. Natl.*  
1107 *Acad. Sci. U.S.a.* 99, 11181–11186.
- 1108 Sun, T., Pikiolk, M., Orsini, V., Bergling, S., Holwerda, S., Morelli, L., Hoppe, P.S., Planas-  
1109 Paz, L., Yang, Y., Ruffner, H., et al. (2020). AXIN2+ Pericentral Hepatocytes Have Limited  
1110 Contributions to Liver Homeostasis and Regeneration. *Cell Stem Cell* 26, 97–107.e6.
- 1111 Taub, R. (2004). Liver regeneration: from myth to mechanism. *Nat. Rev. Mol. Cell Biol.* 5, 836–  
1112 847.
- 1113 Thorgersen, E.B., Barratt-Due, A., Haugaa, H., Harboe, M., Pischke, S.E., Nilsson, P.H., and  
1114 Mollnes, T.E. (2019). The Role of Complement in Liver Injury, Regeneration, and  
1115 Transplantation. *Hepatology* 70, 725–736.
- 1116 Trapnell, C., Cacchiarelli, D., Grimsby, J., Pokharel, P., Li, S., Morse, M., Lennon, N.J., Livak,  
1117 K.J., Mikkelsen, T.S., and Rinn, J.L. (2014). The dynamics and regulators of cell fate decisions  
1118 are revealed by pseudotemporal ordering of single cells. *Nat. Biotechnol.* 32, 381–386.
- 1119 van Dijk, D., Sharma, R., Nainys, J., Yim, K., Kathail, P., Carr, A.J., Burdziak, C., Moon, K.R.,  
1120 Chaffer, C.L., Pattabiraman, D., et al. (2018). Recovering Gene Interactions from Single-Cell  
1121 Data Using Data Diffusion. *Cell* 174, 716–729.e727.
- 1122 Vento-Tormo, R., Efremova, M., Botting, R.A., Turco, M.Y., Vento-Tormo, M., Meyer, K.B.,  
1123 Park, J.-E., Stephenson, E., Polański, K., Goncalves, A., et al. (2018). Single-cell  
1124 reconstruction of the early maternal-fetal interface in humans. *Nature* 563, 347–353.

- 1125 Walesky, C., Edwards, G., Borude, P., Gunewardena, S., O'Neil, M., Yoo, B., and Apte, U.  
1126 (2013). Hepatocyte nuclear factor 4 alpha deletion promotes diethylnitrosamine-induced  
1127 hepatocellular carcinoma in rodents. *Hepatology* 57, 2480–2490.
- 1128 Wang, A.W., Wang, Y.J., Zahm, A.M., Morgan, A.R., Wangensteen, K.J., and Kaestner, K.H.  
1129 (2020). The Dynamic Chromatin Architecture of the Regenerating Liver. *Cell Mol Gastroenterol*  
1130 *Hepatol* 9, 121–143.
- 1131 Wang, A.W., Wangensteen, K.J., Wang, Y.J., Zahm, A.M., Moss, N.G., Erez, N., and  
1132 Kaestner, K.H. (2018). TRAP-seq identifies cystine/glutamate antiporter as a driver of recovery  
1133 from liver injury. *J. Clin. Invest.* 128, 2297–2309.
- 1134 Wang, B., Zhao, L., Fish, M., Logan, C.Y., and Nusse, R. (2015). Self-renewing diploid  
1135 Axin2(+) cells fuel homeostatic renewal of the liver. *Nature* 524, 180–185.
- 1136 Wang, S., Zhang, C., Hasson, D., Desai, A., SenBanerjee, S., Magnani, E., Ukomadu, C.,  
1137 Lujambio, A., Bernstein, E., and Sadler, K.C. (2019). Epigenetic Compensation Promotes Liver  
1138 Regeneration. *Dev. Cell* 50, 43–56.e46.
- 1139 Webber, E.M., FitzGerald, M.J., Brown, P.I., Bartlett, M.H., and Fausto, N. (1993).  
1140 Transforming growth factor- $\alpha$  expression during liver regeneration after partial  
1141 hepatectomy and toxic injury, and potential interactions between transforming growth factor-  
1142  $\alpha$  and hepatocyte growth factor. *Hepatology* 18, 1422–1431.
- 1143 Weibel, E.R., Stäubli, W., Gnägi, H.R., and Hess, F.A. (1969). Correlated morphometric and  
1144 biochemical studies on the liver cell. I. Morphometric model, stereologic methods, and normal  
1145 morphometric data for rat liver. *J. Cell Biol.* 42, 68–91.
- 1146 Westwick, J.K., Weitzel, C., Leffert, H.L., and Brenner, D.A. (1995). Activation of Jun kinase is  
1147 an early event in hepatic regeneration. *Journal of Clinical Investigation* 95, 803–810.
- 1148 Wu, H., Xiao, Y., Zhang, S., Ji, S., Wei, L., Fan, F., Geng, J., Tian, J., Sun, X., Qin, F., et al.  
1149 (2013). The Ets transcription factor GABP is a component of the hippo pathway essential for  
1150 growth and antioxidant defense. *Cell Rep* 3, 1663–1677.
- 1151 Xiong, X., Kuang, H., Ansari, S., Liu, T., Gong, J., Wang, S., Zhao, X.-Y., Ji, Y., Li, C., Guo, L.,  
1152 et al. (2019). Landscape of Intercellular Crosstalk in Healthy and NASH Liver Revealed by  
1153 Single-Cell Secretome Gene Analysis. *Molecular Cell* 75, 644–660.e645.
- 1154 Yang, C.L., Zhang, S.J., Toomey, N.L., Palmer, T.N., and Lee, M.Y. (1991). Induction of DNA  
1155 polymerase activities in the regenerating rat liver. *Biochemistry* 30, 7534–7541.
- 1156 Yang, J., Mowry, L.E., Nejak-Bowen, K.N., Okabe, H., Diegel, C.R., Lang, R.A., Williams, B.O.,  
1157 and Monga, S.P. (2014).  $\beta$ -catenin signaling in murine liver zonation and regeneration: a Wnt-  
1158 Wnt situation! *Hepatology* 60, 964–976.
- 1159 Yanger, K., Knigin, D., Zong, Y., Maggs, L., Gu, G., Akiyama, H., Pikarsky, E., and Stanger,  
1160 B.Z. (2014). Adult hepatocytes are generated by self-duplication rather than stem cell  
1161 differentiation. *Cell Stem Cell* 15, 340–349.
- 1162 Zahm, A.M., Wang, A.W., Wang, Y.J., Schug, J., Wangensteen, K.J., and Kaestner, K.H.

- 1163 (2020). A High-Content Screen Identifies MicroRNAs That Regulate Liver Repopulation After  
1164 Injury in Mice. *Gastroenterology* 158, 1044–1057.e17.
- 1165 Zellmer, S., Schmidt-Heck, W., Godoy, P., Weng, H., Meyer, C., Lehmann, T., Sparna, T.,  
1166 Schormann, W., Hammad, S., Kreutz, C., et al. (2010). Transcription factors ETF, E2F, and  
1167 SP-1 are involved in cytokine-independent proliferation of murine hepatocytes. *Hepatology* 52,  
1168 2127–2136.
- 1169 Zhang, F., Wu, Y., and Tian, W. (2019). A novel approach to remove the batch effect of single-  
1170 cell data. *Cell Discov* 5, 46.
- 1171 Zhao, L., Jin, Y., Donahue, K., Tsui, M., Fish, M., Logan, C.Y., Wang, B., and Nusse, R.  
1172 (2019). Tissue Repair in the Mouse Liver Following Acute Carbon Tetrachloride Depends on  
1173 Injury-Induced Wnt/ $\beta$ -Catenin Signaling. *Hepatology* 69, 2623–2635.
- 1174 Zheng, G.X.Y., Terry, J.M., Belgrader, P., Ryvkin, P., Bent, Z.W., Wilson, R., Ziraldo, S.B.,  
1175 Wheeler, T.D., McDermott, G.P., Zhu, J., et al. (2017). Massively parallel digital transcriptional  
1176 profiling of single cells. *Nature Communications* 8, 14049–12.

## Key Resource Table

| Reagent type<br>(species) or resource | Designation                               | Source or reference                    | Identifiers                                                                                                                                                                               | Additional<br>information                |
|---------------------------------------|-------------------------------------------|----------------------------------------|-------------------------------------------------------------------------------------------------------------------------------------------------------------------------------------------|------------------------------------------|
| Strain, strain background             | Mouse: C57BL/6J                           | The Jackson Laboratory, Bar Harbor, ME | <a href="https://www.jax.org/strain/000664">Stock# 00664, https://www.jax.org/strain/000664</a>                                                                                           |                                          |
| Antibody                              | Anti-Hnf4a C11F12 (rabbit monoclonal)     | Cell Signaling Technology              | Catalog# 3113                                                                                                                                                                             | IF (1:500)                               |
| Antibody                              | Anti-Rabbit IgG(H+L) DyLight 594          | Thermo Fisher Scientific               | Catalog # 35561                                                                                                                                                                           | Cross-Adsorbed Secondary Antibody(1:500) |
| Nuclear stain                         | TO-PRO™-3 Iodide (642/661)                | Thermo Fisher Scientific               | Catalog# T3605                                                                                                                                                                            |                                          |
| Commercial assay or kit               | Click-iT™ EdU Cell Proliferation Kit      | Thermo Fisher Scientific               | Catalog# C10337                                                                                                                                                                           |                                          |
| Reagent                               | 5-Ethynyl-2'-deoxyuridine (EdU)           | Cayman chemical company                | Catalog# 20518                                                                                                                                                                            |                                          |
| Other                                 | Fisherbrand Micro Blood Collecting Tubes  | Thermo Fisher Scientific               | Catalog# 02-668-10                                                                                                                                                                        |                                          |
| Other                                 | BD Microtainer™ Capillary Blood Collector | Thermo Fisher Scientific               | Catalog# 02-675-186                                                                                                                                                                       |                                          |
| Commercial assay or kit               | AST/GOT Reagent                           | Thermo Fisher Scientific               | Catalog# TR70121                                                                                                                                                                          |                                          |
| Commercial assay or kit               | ALT/GPT Reagent                           | Thermo Fisher Scientific               | Catalog# TR71121                                                                                                                                                                          |                                          |
| Other                                 | 4/0 Silk Sutures                          | KW-MED                                 | Catalog# 683S                                                                                                                                                                             | BRAIDED, BLACK,NFS-2, 18"                |
| Other                                 | 5/0 Silk Suture                           | Medrep express                         | Catalog# 682S                                                                                                                                                                             | FS-2, 18"                                |
| Other                                 | 7 mm Reflex clips                         | World Precision Instruments            | Part #500344                                                                                                                                                                              |                                          |
| Reagent                               | Collagenase, Type 4                       | Worthington Biochemical Corporation    | Catalog# LS004188                                                                                                                                                                         |                                          |
| Commercial kit                        | Dead Cell Removal Kit                     | Miltenyi Biotec                        | Order no: 130-090-101                                                                                                                                                                     |                                          |
| Commercial kit                        | MS Columns                                | Miltenyi Biotec                        | Order no: 130-042-201                                                                                                                                                                     |                                          |
| Software/algorithm                    | Cell Ranger                               | 10 X Genomics                          | <a href="https://support.10xgenomics.com/single-cell-gene-expression/software/downloads/latest">https://support.10xgenomics.com/single-cell-gene-expression/software/downloads/latest</a> |                                          |
| Software/algorithm                    | Seurat v 3.1.0                            | PMID: 29608179                         | <a href="https://satijalab.org/seurat/">https://satijalab.org/seurat/</a>                                                                                                                 |                                          |
| Software/algorithm                    | BEER v 0.1.7                              | PMID: 31636959                         | <a href="https://github.com/jumphone/BEER">https://github.com/jumphone/BEER</a>                                                                                                           |                                          |
| Software/algorithm                    | Monocle v 2.0                             | PMID: 24658644                         | <a href="http://cole-trapnell-lab.github.io/monocle-release/docs/">http://cole-trapnell-lab.github.io/monocle-release/docs/</a>                                                           |                                          |
| Software/algorithm                    | SCENIC                                    | PMID: 28991892                         | <a href="https://github.com/aertslab/SCENIC">https://github.com/aertslab/SCENIC</a>                                                                                                       |                                          |
| Software/algorithm                    | Cell communication analysis               | PMID: 30912746                         | <a href="https://elifesciences.org/articles/43882/figures#code1">https://elifesciences.org/articles/43882/figures#code1</a>                                                               |                                          |
